# Supplementary material
Source: publisher figshare collection journal article supplement (https://gsapubs.figshare.com/ndownloader/files/22411893)
Supplement: Supplementary file 1 [file 22411893]

Archive with 5 entries (5 files):
- 2105_SuppItem1.pdf
- 2105_SuppItem2.docx
- 2105_SuppItem3.zip
- 2105_SuppItem4.docx
- 2105_SuppItem5.docx
