# Supplementary material
Source: publisher figshare collection journal article supplement (https://gsapubs.figshare.com/ndownloader/files/22411893)
Supplement: Supplementary file 1 [file 22411893 › 2105_SuppItem1.pdf]

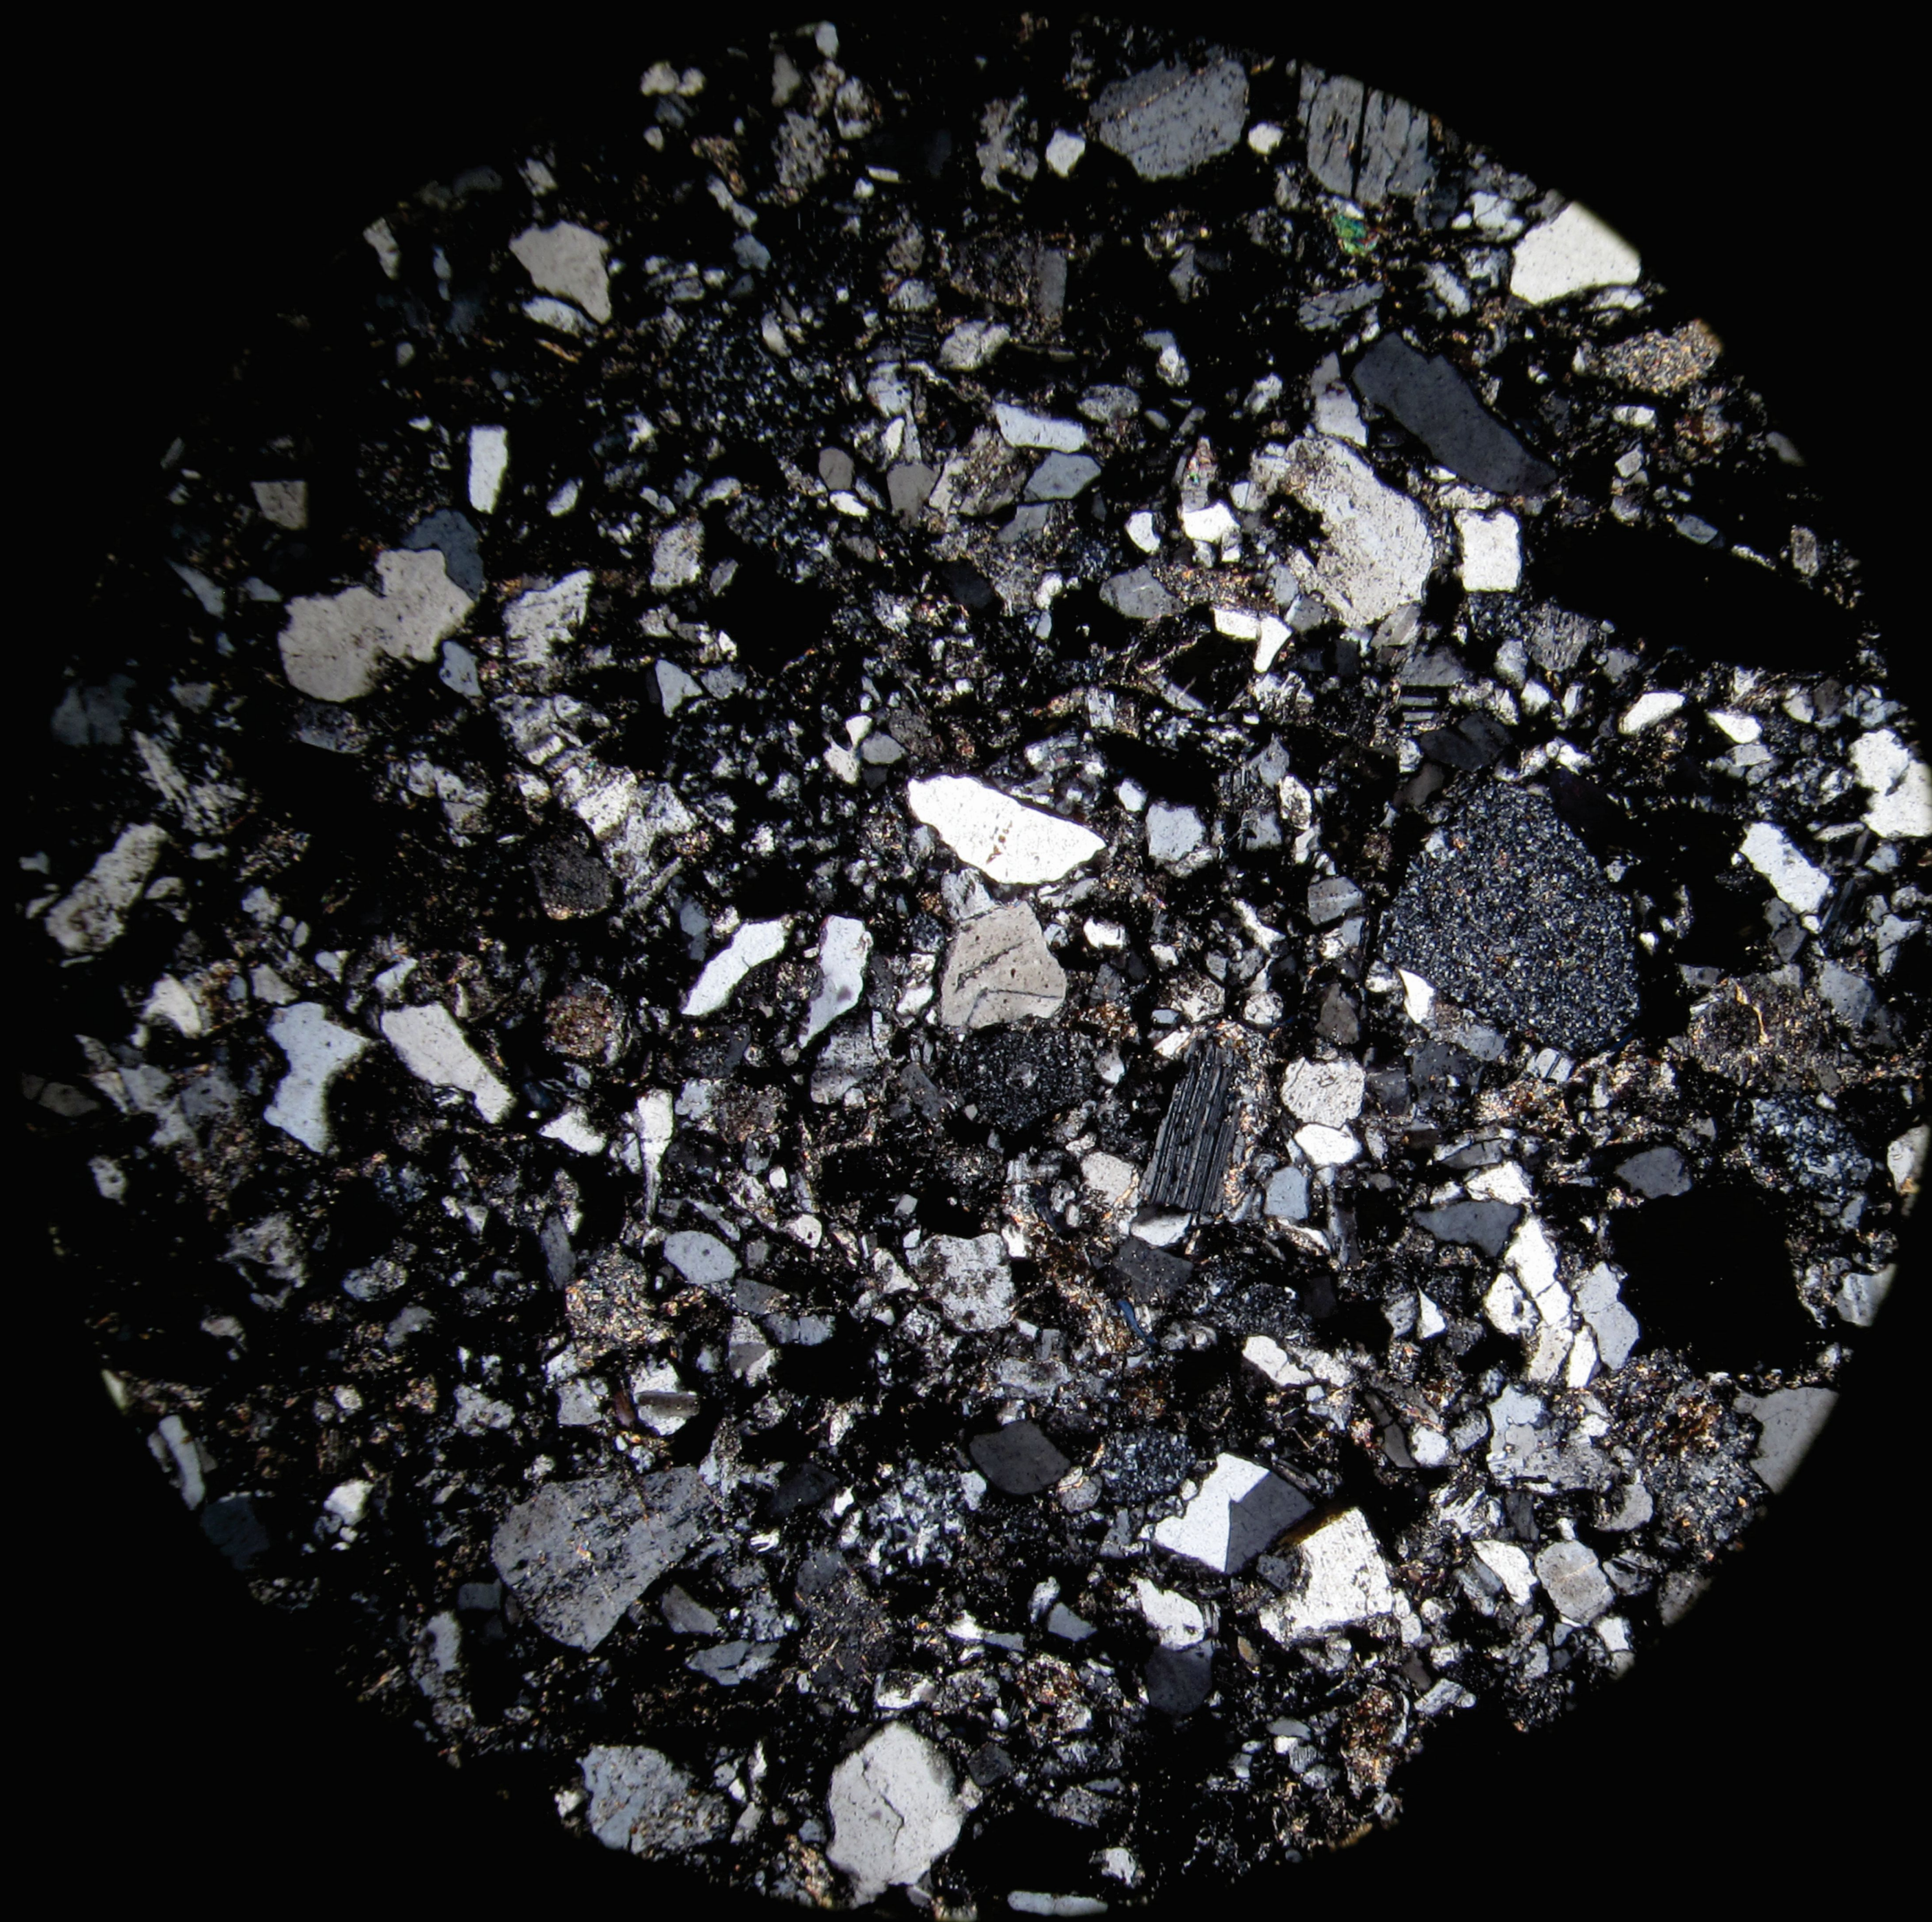

2 mm

---

Powerman, V., Hanson, R., Nosova, A., Girty, G.H., Hourigan, J., and Tretiakov, A., 2019, Nature and timing of Late Devonian–early Mississippian island-arc magmatism in the Northern Sierra terrane and implications for regional Paleozoic plate tectonics: Geosphere, <https://doi.org/10.1130/GES02105.1>.

<https://doi.org/10.1130/GES02105.S1>

Figure S1. Thin section image of the volcanic sandstone (wacke) from the block in the Sierra City melange, polarizers crossed.
