# Supplementary material
Source: publisher figshare collection journal article supplement (https://gsapubs.figshare.com/ndownloader/files/22411893)
Supplement: Supplementary file 1 [file 22411893 › 2105_SuppItem2.docx]

# **Powerman, V., Hanson, R., Nosova, A., Girty, G.H., Hourigan, J., and Tretiakov, A., 2019, Nature and timing of Late Devonian–early Mississippian island-arc magmatism in the Northern Sierra terrane and implications for regional Paleozoic plate tectonics: Geosphere, https://doi.org/10.1130/GES02105.1.**

https://doi.org/10.1130/GES02105.S1

# Supplemental Item 2

**Supplementary 1: figure**

**Figure S1**. Thin section image of the volcanic sandstone (wacke) from the block in the Sierra City melange, polarizers crossed.

**Supplementary 2: Volcanic sandstone (wacke) sample from the Sierra City melange thin section description**

The rock is an immature, poorly sorted, medium- to fine-grained sublithic wacke that contains a significant fraction of volcanic material.  Quartz grains are subangular to angular and make up about 30% of the sand grains and about 50% of the silt grains; they also dominate among rare granule conglomerate clasts. Plagioclase is predominantly twinned and sometimes sericitized; it forms about 40% of the sand grains and about 30% of the silt grains. Rare chloritized mica (biotite) flakes are found. The most common rock fragments are fine-grained felsite-like aggregates, which in some cases contain feldspar, quartz and amphibole(?) microphenocrysts. Other rock fragments include microgranite and andesite with feldspar microlites. Among heavy minerals are rare zircons and more abundant rutiles.

The mineral and rock fragments are cemented by the clay matrix without noticeable precipitated mineral cements. The matrix was probably partially recrystallized. Matrix average about 20%.

Deformation is weak; brecciation or preferred orientation of grains is not obvious. There are thin fissures and single sericite-chalcedony veinlets only.

A little plant detritus is present.

The volcanic sandstone (wacke) has a significant fraction of felsic magmatic fragments and does not possess abundant quartz. Dominated feldspar component and the abundance of magmatic rock fragments, suggesting abundant eroding igneous rock, either intrusive or extrusive, as the source of detritus.

**Supplementary 3: ARCGIS files for the digitized geologic map of the Bowman Lake and Sierra Buttes vicinity**
