# Supplementary material
Source: publisher figshare collection journal article supplement (https://gsapubs.figshare.com/ndownloader/files/22411893)
Supplement: Supplementary file 1 [file 22411893 › 2105_SuppItem4.docx]

| SUPPLEMENTAL ITEM 4. SENSITIVE HIGH-RESOLUTION ION MICROPROBE–REVERSE GEOMETRY (SHRIMP-RG) ANALYTICAL U-Th-Pb DATA FOR ZIRCONS FROM MAGMATIC ROCKS OF THE NORTHERN SIERRA TERRANE | | | | | | | | | | | | | | | | | | | |
| --- | --- | --- | --- | --- | --- | --- | --- | --- | --- | --- | --- | --- | --- | --- | --- | --- | --- | --- | --- |
| Spot | Composition | | | |  | 204Pb-corrected isotopic ratios | | | | |  | 204Pb-corrected dates (Ma) | | | | | | | Comment |
| U  (ppm) | Th  (ppm) | U/  Th | Pb  comm.  (%) |  | (207Pb/235U) | ±1σ  (abs.) | (206Pb/238U) | ±1σ  (abs.) | Error  corr. |  | (206Pb/238U) | ±1σ  (abs.) | (207Pb/235U) | ±1σ  (abs.) | Discordance  (%) | (206Pb/207Pb) | ±1σ  (abs.) |
|  |  |
|  |  |
| VP-XI-BL-23, granodiorite | | | |  |  |  |  |  |  |  |  |  |  |  |  |  |  |  |  |
| 23-4 | 136 | 46 | 2.9 | 0.31 |  | 0.4060 | 0.0210 | 0.0558 | 0.0012 | 0.40 |  | 350 | 7 | 346 | 15 | –1 | 317 | 107 |  |
| 23-11 | 325 | 158 | 2.1 | 0.22 |  | 0.4097 | 0.0136 | 0.0568 | 0.0011 | 0.58 |  | 356 | 7 | 349 | 10 | –2 | 298 | 62 |  |
| 23-15 | 142 | 61 | 2.3 | –0.10 |  | 0.3943 | 0.0232 | 0.0578 | 0.0012 | 0.35 |  | 362 | 7 | 338 | 17 | –7 | 170 | 128 |  |
| 23-18 | 129 | 50 | 2.6 | 0.32 |  | 0.4000 | 0.0255 | 0.0580 | 0.0012 | 0.33 |  | 363 | 7 | 342 | 18 | –6 | 197 | 140 |  |
| 23-7 | 246 | 86 | 2.9 | –0.03 |  | 0.4124 | 0.0147 | 0.0587 | 0.0011 | 0.55 |  | 368 | 7 | 351 | 11 | –5 | 239 | 68 |  |
| 23-9 | 172 | 53 | 3.3 | 0.04 |  | 0.4217 | 0.0193 | 0.0592 | 0.0012 | 0.44 |  | 371 | 7 | 357 | 14 | –4 | 271 | 94 |  |
| 23-16 | 370 | 206 | 1.8 | 0.08 |  | 0.4156 | 0.0143 | 0.0592 | 0.0011 | 0.56 |  | 370 | 7 | 353 | 10 | –5 | 239 | 66 |  |
| 23-17 | 348 | 177 | 2.0 | –0.23 |  | 0.4153 | 0.0134 | 0.0605 | 0.0012 | 0.59 |  | 379 | 7 | 353 | 10 | –7 | 186 | 61 |  |
| 23-13 | 391 | 145 | 2.7 | –0.07 |  | 0.4435 | 0.0113 | 0.0609 | 0.0012 | 0.74 |  | 381 | 7 | 373 | 8 | –2 | 322 | 39 |  |
| 23-5 | 372 | 182 | 2.0 | –0.07 |  | 0.4342 | 0.0129 | 0.0611 | 0.0012 | 0.65 |  | 382 | 7 | 366 | 9 | –4 | 265 | 52 |  |
| Age (Ma)* | MSWD† | MSWDcrit§ | |  |  | AS3 age (Ma)# | | | MSWD |  |  |  |  |  |  |  |  |  |  |
| 368.2 ± 7.6 | 2.2 | 2.111 | |  |  | 1084 ± 42 | | | 1.3 |  |  |  |  |  |  |  |  |  |  |
|  |  |  |  |  |  |  |  |  |  |  |  |  |  |  |  |  |  |  |  |
| VP-XI-BL-24, granite | | |  |  |  |  |  |  |  |  |  |  |  |  |  |  |  |  |  |
| 24-3 | 301 | 95 | 3.2 | 0.02 |  | 0.3977 | 0.0131 | 0.0553 | 0.0011 | 0.59 |  | 347 | 6 | 340 | 9 | –2 | 292 | 61 |  |
| 24-12 | 378 | 192 | 2.0 | 0.39 |  | 0.4222 | 0.0132 | 0.0568 | 0.0011 | 0.60 |  | 356 | 7 | 358 | 9 | 0 | 368 | 56 |  |
| 24-5 | 294 | 91 | 3.2 | 0.12 |  | 0.4247 | 0.0133 | 0.0587 | 0.0011 | 0.61 |  | 368 | 7 | 359 | 9 | –2 | 306 | 56 |  |
| 24-10 | 382 | 128 | 3.0 | 0.01 |  | 0.4374 | 0.0103 | 0.0589 | 0.0011 | 0.80 |  | 369 | 7 | 368 | 7 | 0 | 366 | 32 |  |
| 24-4 | 210 | 83 | 2.5 | –0.13 |  | 0.3857 | 0.0234 | 0.0586 | 0.0012 | 0.33 |  | 367 | 7 | 331 | 17 | –10 | 86 | 136 |  |
| 24-1 | 540 | 235 | 2.3 | –0.18 |  | 0.4234 | 0.0100 | 0.0593 | 0.0011 | 0.80 |  | 371 | 7 | 358 | 7 | –3 | 277 | 32 |  |
| 24-9 | 404 | 173 | 2.3 | –0.10 |  | 0.4325 | 0.0121 | 0.0594 | 0.0011 | 0.68 |  | 372 | 7 | 365 | 9 | –2 | 319 | 47 |  |
| 24-15 | 308 | 98 | 3.2 | –0.22 |  | 0.4397 | 0.0115 | 0.0598 | 0.0011 | 0.73 |  | 374 | 7 | 370 | 8 | –1 | 343 | 41 |  |
| 24-16 | 282 | 130 | 2.2 | –0.12 |  | 0.4394 | 0.0112 | 0.0600 | 0.0012 | 0.76 |  | 376 | 7 | 370 | 8 | –2 | 334 | 38 |  |
| 24-8 | 307 | 145 | 2.1 | 0.02 |  | 0.4292 | 0.0142 | 0.0600 | 0.0012 | 0.58 |  | 375 | 7 | 363 | 10 | –3 | 282 | 61 |  |
| 24-2 | 424 | 129 | 3.3 | –0.07 |  | 0.4114 | 0.0146 | 0.0599 | 0.0011 | 0.54 |  | 375 | 7 | 350 | 10 | –7 | 188 | 69 |  |
| 24-13 | 360 | 128 | 2.8 | 0.06 |  | 0.4238 | 0.0148 | 0.0601 | 0.0011 | 0.55 |  | 376 | 7 | 359 | 11 | –5 | 248 | 67 |  |
| 24-14 | 586 | 340 | 1.7 | –0.13 |  | 0.4355 | 0.0113 | 0.0614 | 0.0011 | 0.72 |  | 384 | 7 | 367 | 8 | –4 | 260 | 42 |  |
| Age (Ma)* | MSWD† | MSWDcrit§ | |  |  | AS3 age (Ma)# | | | MSWD |  |  |  |  |  |  |  |  |  |  |
| 369.6 ± 5.9 | 2.0 | 1.942 | |  |  | 1084 ± 42 | | | 1.3 |  |  |  |  |  |  |  |  |  |  |
|  |  |  |  |  |  |  |  |  |  |  |  |  |  |  |  |  |  |  |  |
| VP-XI-BL-46, enclave-rich trondhjemite | | | | |  |  |  |  |  |  |  |  |  |  |  |  |  |  |  |
| 46-3 | 119 | 41 | 2.9 | 0.59 |  | 0.4202 | 0.0267 | 0.0563 | 0.0012 | 0.33 |  | 353 | 7 | 356 | 19 | 1 | 378 | 135 |  |
| 46-1 | 466 | 356 | 1.3 | 0.28 |  | 0.4082 | 0.0121 | 0.0566 | 0.0011 | 0.64 |  | 355 | 7 | 348 | 9 | –2 | 300 | 52 |  |
| 46-18 | 118 | 42 | 2.8 | 0.91 |  | 0.4594 | 0.0183 | 0.0578 | 0.0012 | 0.51 |  | 362 | 7 | 384 | 13 | 6 | 515 | 75 |  |
| 46-12 | 146 | 54 | 2.7 | 0.08 |  | 0.3961 | 0.0209 | 0.0577 | 0.0012 | 0.38 |  | 361 | 7 | 339 | 15 | –6 | 187 | 113 |  |
| 46-16 | 132 | 49 | 2.7 | 0.24 |  | 0.4263 | 0.0191 | 0.0580 | 0.0012 | 0.46 |  | 363 | 7 | 361 | 14 | –1 | 342 | 90 |  |
| 46-6 | 244 | 91 | 2.7 | 0.02 |  | 0.4110 | 0.0151 | 0.0587 | 0.0011 | 0.53 |  | 368 | 7 | 350 | 11 | –5 | 229 | 72 |  |
| 46-8 | 217 | 78 | 2.8 | –0.16 |  | 0.4111 | 0.0148 | 0.0601 | 0.0012 | 0.54 |  | 376 | 7 | 350 | 11 | –7 | 178 | 71 |  |
| 46-17 | 204 | 118 | 1.7 | 0.27 |  | 0.4285 | 0.0168 | 0.0602 | 0.0012 | 0.50 |  | 377 | 7 | 362 | 12 | –4 | 267 | 78 |  |
| Age (Ma)* | MSWD† | MSWDcrit§ | |  |  | AS3 age (Ma)# | | | MSWD |  |  |  |  |  |  |  |  |  |  |
| 364.3 ± 5.0 | 1.6 | 2.286 | |  |  | 1084 ± 42 | | | 1.3 |  |  |  |  |  |  |  |  |  |  |
|  |  |  |  |  |  |  |  |  |  |  |  |  |  |  |  |  |  |  |  |
| VP-XI-BL-55, enclave-poor trondhjemite | | | | |  |  |  |  |  |  |  |  |  |  |  |  |  |  |  |
| 55-2 | 118 | 38 | 3.1 | –0.06 |  | 0.3922 | 0.0189 | 0.0555 | 0.0015 | 0.57 |  | 348 | 9 | 336 | 14 | –3 | 254 | 91 |  |
| 55-1 | 116 | 39 | 3.0 | 0.07 |  | 0.3913 | 0.0219 | 0.0561 | 0.0015 | 0.49 |  | 352 | 9 | 335 | 16 | –5 | 224 | 112 |  |
| 55-6 | 253 | 92 | 2.7 | 0.18 |  | 0.4186 | 0.0149 | 0.0566 | 0.0015 | 0.73 |  | 355 | 9 | 355 | 11 | 0 | 356 | 55 |  |
| 55-8 | 144 | 52 | 2.7 | –0.08 |  | 0.4058 | 0.0172 | 0.0568 | 0.0016 | 0.65 |  | 356 | 10 | 346 | 12 | –3 | 276 | 74 |  |
| 55-9 | 246 | 102 | 2.4 | 0.18 |  | 0.4344 | 0.0145 | 0.0571 | 0.0015 | 0.78 |  | 358 | 9 | 366 | 10 | 2 | 418 | 47 |  |
| 55-7 | 125 | 42 | 3.0 | –0.16 |  | 0.3892 | 0.0193 | 0.0569 | 0.0015 | 0.54 |  | 357 | 9 | 334 | 14 | –6 | 178 | 97 |  |
| 55-3 | 159 | 57 | 2.8 | 0.07 |  | 0.4119 | 0.0203 | 0.0571 | 0.0015 | 0.54 |  | 358 | 9 | 350 | 15 | –2 | 299 | 95 |  |
| 55-10 | 149 | 69 | 2.2 | –0.01 |  | 0.3906 | 0.0215 | 0.0571 | 0.0015 | 0.49 |  | 358 | 9 | 335 | 16 | –6 | 178 | 112 |  |
| 55-4 | 156 | 59 | 2.7 | –0.21 |  | 0.4157 | 0.0159 | 0.0579 | 0.0015 | 0.70 |  | 363 | 9 | 353 | 11 | –3 | 290 | 62 |  |
| 55-12 | 262 | 90 | 2.9 | –0.21 |  | 0.4224 | 0.0170 | 0.0600 | 0.0016 | 0.66 |  | 376 | 10 | 358 | 12 | –5 | 244 | 70 |  |
| Age (Ma)* | MSWD† | MSWDcrit§ | |  |  |  | |  |  |  |  |  |  |  |  |  |  |  |  |
| 357.8 ± 5.9 | 0.59 | 2.111 | |  |  |  | | |  |  |  |  |  |  |  |  |  |  |  |
|  |  |  |  |  |  |  |  |  |  |  |  |  |  |  |  |  |  |  |  |
| VP-XI-BL-59, enclave-rich trondhjemite | | | | |  |  |  |  |  |  |  |  |  |  |  |  |  |  |  |
| 59-11 | 144 | 92 | 1.6 | 0.00 |  | 0.3954 | 0.0099 | 0.0530 | 0.0010 | 0.78 |  | 333 | 6 | 338 | 7 | 2 | 377 | 35 |  |
| 59-20 | 287 | 218 | 1.3 | 0.08 |  | 0.4001 | 0.0095 | 0.0539 | 0.0010 | 0.82 |  | 338 | 6 | 342 | 7 | 1 | 364 | 31 |  |
| 59-18 | 121 | 53 | 2.3 | 0.13 |  | 0.4124 | 0.0153 | 0.0545 | 0.0015 | 0.75 |  | 342 | 9 | 351 | 11 | 2 | 408 | 55 |  |
| 59-3 | 142 | 76 | 1.9 | 0.10 |  | 0.3927 | 0.0105 | 0.0547 | 0.0011 | 0.74 |  | 343 | 7 | 336 | 8 | –2 | 290 | 41 |  |
| 59-1 | 129 | 66 | 2.0 | 0.21 |  | 0.3999 | 0.0135 | 0.0550 | 0.0011 | 0.60 |  | 345 | 7 | 342 | 10 | –1 | 318 | 62 |  |
| 59-2 | 123 | 61 | 2.0 | 0.00 |  | 0.4238 | 0.0126 | 0.0559 | 0.0011 | 0.68 |  | 351 | 7 | 359 | 9 | 2 | 410 | 49 |  |
| 59-10 | 134 | 56 | 2.4 | 0.00 |  | 0.4112 | 0.0127 | 0.0566 | 0.0012 | 0.66 |  | 355 | 7 | 350 | 9 | –1 | 315 | 53 |  |
| 59-13 | 121 | 70 | 1.7 | 0.16 |  | 0.4233 | 0.0117 | 0.0567 | 0.0011 | 0.71 |  | 355 | 7 | 358 | 8 | 1 | 378 | 43 |  |
| 59-7 | 120 | 67 | 1.8 | 0.14 |  | 0.4120 | 0.0117 | 0.0575 | 0.0011 | 0.70 |  | 360 | 7 | 350 | 8 | –3 | 284 | 47 |  |
| 59-9 | 147 | 60 | 2.4 | 0.00 |  | 0.4309 | 0.0126 | 0.0574 | 0.0012 | 0.74 |  | 360 | 8 | 364 | 9 | 1 | 389 | 45 |  |
| 59-5 | 128 | 55 | 2.3 | 0.10 |  | 0.4323 | 0.0126 | 0.0574 | 0.0011 | 0.68 |  | 360 | 7 | 365 | 9 | 1 | 397 | 48 |  |
| 59-19 | 130 | 57 | 2.3 | 0.10 |  | 0.4204 | 0.0109 | 0.0581 | 0.0011 | 0.75 |  | 364 | 7 | 356 | 8 | –2 | 307 | 39 |  |
| 59-14 | 198 | 158 | 1.2 | 0.02 |  | 0.4269 | 0.0100 | 0.0582 | 0.0011 | 0.83 |  | 364 | 7 | 361 | 7 | –1 | 339 | 29 |  |
| 59-4 | 192 | 66 | 2.9 | 0.04 |  | 0.4289 | 0.0120 | 0.0583 | 0.0013 | 0.78 |  | 365 | 8 | 362 | 8 | –1 | 343 | 40 |  |
| 59-16 | 179 | 76 | 2.4 | 0.14 |  | 0.4212 | 0.0127 | 0.0583 | 0.0012 | 0.66 |  | 366 | 7 | 357 | 9 | –2 | 301 | 52 |  |
| 59-17 | 172 | 110 | 1.6 | 0.00 |  | 0.4449 | 0.0103 | 0.0586 | 0.0011 | 0.84 |  | 367 | 7 | 374 | 7 | 2 | 415 | 29 |  |
| 59-15 | 123 | 66 | 1.9 | 0.09 |  | 0.4367 | 0.0115 | 0.0590 | 0.0012 | 0.75 |  | 369 | 7 | 368 | 8 | 0 | 358 | 39 |  |
| 59-6 | 212 | 73 | 2.9 | 0.02 |  | 0.4485 | 0.0103 | 0.0597 | 0.0012 | 0.84 |  | 374 | 7 | 376 | 7 | 1 | 391 | 28 |  |
| 59-8 | 122 | 58 | 2.1 | 0.19 |  | 0.4568 | 0.0161 | 0.0616 | 0.0016 | 0.74 |  | 386 | 10 | 382 | 11 | –1 | 360 | 54 |  |
| Age (Ma)* | MSWD† | MSWDcrit§ | |  |  | AS3 age (Ma)# | | | MSWD |  |  |  |  |  |  |  |  |  |  |
| 356.7 ± 6.2 | 3.3 | 1.750 | |  |  | 1100.8 ± 9.3 | | | 1.1 |  |  |  |  |  |  |  |  |  |  |
|  |  |  |  |  |  |  |  |  |  |  |  |  |  |  |  |  |  |  |  |
| VP-XI-BL-60, mafic enclave in trondhjemite | | | | |  |  |  |  |  |  |  |  |  |  |  |  |  |  |  |
| 60-1 | 171 | 61 | 2.8 | 0.08 |  | 0.3977 | 0.0100 | 0.0534 | 0.0011 | 0.80 |  | 335 | 7 | 340 | 7 | 1 | 372 | 34 |  |
| 60-18 | 143 | 45 | 3.1 | 0.20 |  | 0.3855 | 0.0141 | 0.0541 | 0.0011 | 0.54 |  | 339 | 7 | 331 | 10 | –2 | 273 | 70 |  |
| 60-16 | 160 | 92 | 1.7 | 0.14 |  | 0.4016 | 0.0099 | 0.0546 | 0.0011 | 0.82 |  | 343 | 7 | 343 | 7 | 0 | 344 | 32 |  |
| 60-17 | 135 | 71 | 1.9 | 0.26 |  | 0.3970 | 0.0141 | 0.0551 | 0.0011 | 0.56 |  | 346 | 7 | 339 | 10 | –2 | 296 | 68 |  |
| 60-7 | 129 | 43 | 3.0 | 0.27 |  | 0.3950 | 0.0149 | 0.0558 | 0.0012 | 0.57 |  | 350 | 7 | 338 | 11 | –3 | 255 | 71 |  |
| 60-6 | 136 | 67 | 2.0 | 0.16 |  | 0.4071 | 0.0108 | 0.0558 | 0.0011 | 0.73 |  | 350 | 7 | 347 | 8 | –1 | 324 | 41 |  |
| 60-19 | 269 | 92 | 2.9 | 0.00 |  | 0.4125 | 0.0094 | 0.0560 | 0.0011 | 0.89 |  | 351 | 7 | 351 | 7 | 0 | 347 | 23 |  |
| 60-4 | 147 | 55 | 2.7 | 0.27 |  | 0.4059 | 0.0158 | 0.0561 | 0.0011 | 0.51 |  | 352 | 7 | 346 | 11 | –2 | 305 | 76 |  |
| 60-21 | 140 | 53 | 2.7 | 0.00 |  | 0.4171 | 0.0118 | 0.0561 | 0.0011 | 0.71 |  | 352 | 7 | 354 | 8 | 1 | 366 | 45 |  |
| 60-5 | 188 | 71 | 2.7 | 0.09 |  | 0.4183 | 0.0102 | 0.0561 | 0.0011 | 0.84 |  | 352 | 7 | 355 | 7 | 1 | 375 | 29 |  |
| 60-3 | 129 | 82 | 1.6 | 0.00 |  | 0.4210 | 0.0097 | 0.0561 | 0.0011 | 0.84 |  | 352 | 7 | 357 | 7 | 1 | 390 | 28 |  |
| 60-22 | 269 | 82 | 3.3 | 0.11 |  | 0.4230 | 0.0102 | 0.0561 | 0.0011 | 0.80 |  | 352 | 7 | 358 | 7 | 2 | 398 | 32 |  |
| 60-11 | 236 | 89 | 2.6 | 0.21 |  | 0.4104 | 0.0114 | 0.0563 | 0.0011 | 0.70 |  | 353 | 7 | 349 | 8 | –1 | 325 | 45 |  |
| 60-15 | 169 | 55 | 3.1 | 0.55 |  | 0.3871 | 0.0178 | 0.0564 | 0.0011 | 0.43 |  | 354 | 7 | 332 | 13 | –6 | 183 | 96 |  |
| 60-10 | 153 | 75 | 2.0 | 0.05 |  | 0.4155 | 0.0102 | 0.0565 | 0.0011 | 0.79 |  | 354 | 7 | 353 | 7 | 0 | 344 | 34 |  |
| 60-20 | 188 | 60 | 3.1 | 0.10 |  | 0.4190 | 0.0126 | 0.0565 | 0.0011 | 0.66 |  | 354 | 7 | 355 | 9 | 0 | 363 | 51 |  |
| 60-13 | 145 | 90 | 1.6 | –0.10 |  | 0.4205 | 0.0100 | 0.0564 | 0.0011 | 0.81 |  | 354 | 7 | 356 | 7 | 1 | 375 | 31 |  |
| 60-8 | 223 | 125 | 1.8 | 0.08 |  | 0.4134 | 0.0099 | 0.0567 | 0.0011 | 0.81 |  | 355 | 7 | 351 | 7 | –1 | 325 | 32 |  |
| 60-14 | 161 | 93 | 1.7 | 0.00 |  | 0.4333 | 0.0096 | 0.0580 | 0.0011 | 0.87 |  | 363 | 7 | 365 | 7 | 1 | 380 | 25 |  |
| 60-2 | 302 | 148 | 2.0 | 0.03 |  | 0.4315 | 0.0090 | 0.0582 | 0.0011 | 0.92 |  | 365 | 7 | 364 | 6 | 0 | 361 | 19 |  |
| 60-12 | 169 | 94 | 1.8 | 0.11 |  | 0.4301 | 0.0109 | 0.0588 | 0.0011 | 0.77 |  | 368 | 7 | 363 | 8 | –1 | 332 | 37 |  |
| 60-9 | 138 | 58 | 2.4 | 0.13 |  | 0.4267 | 0.0120 | 0.0593 | 0.0012 | 0.70 |  | 371 | 7 | 361 | 9 | –3 | 293 | 46 |  |
| Age (Ma)* | MSWD† | MSWDcrit§ | |  |  | AS3 age (Ma)# | | | MSWD |  |  |  |  |  |  |  |  |  |  |
| 352.8 ± 2.9 | 1.6 | 1.690 | |  |  | 1100.8 ± 9.3 | | | 1.1 |  |  |  |  |  |  |  |  |  |  |
|  |  |  |  |  |  |  |  |  |  |  |  |  |  |  |  |  |  |  |  |
| VP-XI-BL-61, granite | | |  |  |  |  |  |  |  |  |  |  |  |  |  |  |  |  |  |
| 61.8 | 446 | 247 | 1.8 | 0.13 |  | 0.4214 | 0.0200 | 0.0568 | 0.0023 | 0.85 |  | 356 | 14 | 357 | 14 | 0 | 362 | 57 |  |
| 61.1 | 470 | 486 | 1.0 | 0.17 |  | 0.4281 | 0.0158 | 0.0577 | 0.0020 | 0.92 |  | 362 | 12 | 362 | 11 | 0 | 361 | 33 |  |
| 61.3 | 621 | 299 | 2.1 | 0.20 |  | 0.4250 | 0.0168 | 0.0578 | 0.0021 | 0.93 |  | 363 | 13 | 360 | 12 | –1 | 340 | 34 |  |
| 61.6 | 645 | 309 | 2.1 | 0.00 |  | 0.4287 | 0.0156 | 0.0582 | 0.0020 | 0.95 |  | 365 | 12 | 362 | 11 | –1 | 346 | 25 |  |
| 61.10 | 803 | 549 | 1.5 | 0.02 |  | 0.4394 | 0.0157 | 0.0592 | 0.0020 | 0.97 |  | 371 | 12 | 370 | 11 | 0 | 364 | 20 |  |
| 61.5 | 915 | 412 | 2.2 | –0.05 |  | 0.4392 | 0.0173 | 0.0598 | 0.0023 | 0.97 |  | 374 | 14 | 370 | 12 | –1 | 341 | 20 |  |
| 61.4 | 880 | 422 | 2.1 | –0.07 |  | 0.4457 | 0.0152 | 0.0605 | 0.0020 | 0.97 |  | 378 | 12 | 374 | 11 | –1 | 347 | 19 |  |
| 61.7 | 1123 | 615 | 1.8 | –0.08 |  | 0.4444 | 0.0192 | 0.0618 | 0.0025 | 0.93 |  | 386 | 15 | 373 | 14 | –3 | 292 | 36 |  |
| 61.2 | 968 | 363 | 2.7 | 0.03 |  | 0.4655 | 0.0160 | 0.0617 | 0.0021 | 0.97 |  | 386 | 13 | 388 | 11 | 0 | 398 | 17 |  |
| Age (Ma)* | MSWD† | MSWDcrit§ | |  |  |  | |  |  |  |  |  |  |  |  |  |  |  |  |
| 370.9 ± 8.6 | 0.67 | 2.111 | |  |  |  | |  |  |  |  |  |  |  |  |  |  |  |  |
|  |  |  |  |  |  |  |  |  |  |  |  |  |  |  |  |  |  |  |  |
| VP-XI-BL-62, enclave-poor trondhjemite | | | | |  |  |  |  |  |  |  |  |  |  |  |  |  |  |  |
| 62_19 | 995 | 947 | 1.0 | 0.10 |  | 0.3818 | 0.0113 | 0.0526 | 0.0014 | 0.88 |  | 330 | 8 | 328 | 8 | –1 | 313 | 32 |  |
| 62_28 | 961 | 565 | 1.7 | 0.03 |  | 0.3873 | 0.0110 | 0.0530 | 0.0014 | 0.91 |  | 333 | 8 | 332 | 8 | 0 | 330 | 27 |  |
| 62_22 | 556 | 372 | 1.5 | 0.26 |  | 0.3968 | 0.0126 | 0.0536 | 0.0014 | 0.82 |  | 337 | 9 | 339 | 9 | 1 | 358 | 41 |  |
| 62_23 | 406 | 208 | 2.0 | 0.02 |  | 0.3859 | 0.0147 | 0.0536 | 0.0014 | 0.68 |  | 337 | 9 | 331 | 11 | –2 | 295 | 64 |  |
| 62_26 | 1100 | 940 | 1.2 | 0.10 |  | 0.4091 | 0.0115 | 0.0550 | 0.0014 | 0.92 |  | 345 | 9 | 348 | 8 | 1 | 368 | 25 |  |
| 62_2 | 654 | 480 | 1.4 | 0.11 |  | 0.4063 | 0.0130 | 0.0551 | 0.0016 | 0.89 |  | 346 | 10 | 346 | 9 | 0 | 349 | 33 |  |
| 62_20 | 1134 | 1008 | 1.1 | 0.02 |  | 0.4077 | 0.0119 | 0.0563 | 0.0015 | 0.89 |  | 353 | 9 | 347 | 9 | –2 | 308 | 31 |  |
| 62_21 | 644 | 459 | 1.4 | 0.19 |  | 0.4163 | 0.0154 | 0.0564 | 0.0019 | 0.90 |  | 354 | 11 | 353 | 11 | 0 | 352 | 37 |  |
| 62_18 | 432 | 245 | 1.8 | 0.21 |  | 0.4316 | 0.0154 | 0.0566 | 0.0015 | 0.73 |  | 355 | 9 | 364 | 11 | 3 | 425 | 55 |  |
| 62_5 | 806 | 685 | 1.2 | 0.01 |  | 0.4204 | 0.0123 | 0.0573 | 0.0015 | 0.89 |  | 359 | 9 | 356 | 9 | –1 | 339 | 31 |  |
| 62_7 | 678 | 451 | 1.5 | 0.15 |  | 0.4278 | 0.0134 | 0.0574 | 0.0015 | 0.85 |  | 360 | 9 | 362 | 10 | 0 | 373 | 37 |  |
| 62_25 | 759 | 499 | 1.5 | 0.05 |  | 0.4192 | 0.0131 | 0.0578 | 0.0015 | 0.85 |  | 362 | 9 | 355 | 9 | –2 | 313 | 38 |  |
| 62_17 | 1266 | 1193 | 1.1 | –0.10 |  | 0.4229 | 0.0118 | 0.0583 | 0.0015 | 0.93 |  | 365 | 9 | 358 | 8 | –2 | 313 | 23 |  |
| 62_11 | 1237 | 1144 | 1.1 | 0.01 |  | 0.4337 | 0.0122 | 0.0589 | 0.0015 | 0.92 |  | 369 | 9 | 366 | 9 | –1 | 348 | 25 |  |
| 62_15 | 1322 | 1317 | 1.0 | –0.06 |  | 0.4302 | 0.0120 | 0.0588 | 0.0015 | 0.93 |  | 369 | 9 | 363 | 8 | –1 | 330 | 23 |  |
| 62_30 | 817 | 653 | 1.3 | 0.01 |  | 0.4331 | 0.0128 | 0.0592 | 0.0015 | 0.88 |  | 371 | 9 | 365 | 9 | –2 | 330 | 32 |  |
| 62_1 | 1023 | 503 | 2.0 | 0.03 |  | 0.4417 | 0.0125 | 0.0595 | 0.0016 | 0.92 |  | 372 | 9 | 371 | 9 | 0 | 366 | 25 |  |
| 62_6 | 1106 | 943 | 1.2 | –0.01 |  | 0.4355 | 0.0124 | 0.0594 | 0.0015 | 0.91 |  | 372 | 9 | 367 | 9 | –1 | 335 | 27 |  |
| 62_27 | 1219 | 1173 | 1.0 | 0.10 |  | 0.4475 | 0.0126 | 0.0596 | 0.0015 | 0.92 |  | 373 | 9 | 376 | 9 | 1 | 390 | 25 |  |
| 62_13 | 966 | 869 | 1.1 | 0.10 |  | 0.4498 | 0.0128 | 0.0598 | 0.0016 | 0.92 |  | 374 | 9 | 377 | 9 | 1 | 394 | 26 |  |
| 62_24 | 1089 | 898 | 1.2 | –0.04 |  | 0.4395 | 0.0126 | 0.0598 | 0.0016 | 0.92 |  | 374 | 10 | 370 | 9 | –1 | 343 | 25 |  |
| 62_16 | 993 | 890 | 1.1 | –0.10 |  | 0.4311 | 0.0124 | 0.0597 | 0.0015 | 0.90 |  | 374 | 9 | 364 | 9 | –3 | 301 | 29 |  |
| 62_10 | 1020 | 724 | 1.4 | –0.03 |  | 0.4427 | 0.0126 | 0.0600 | 0.0016 | 0.91 |  | 376 | 9 | 372 | 9 | –1 | 350 | 26 |  |
| 62_29 | 973 | 841 | 1.2 | –0.22 |  | 0.4330 | 0.0122 | 0.0602 | 0.0016 | 0.92 |  | 377 | 9 | 365 | 9 | –3 | 291 | 26 |  |
| 62_14 | 1064 | 1029.58 | 1.0 | 0.06 |  | 0.4552 | 0.0128 | 0.0604 | 0.0016 | 0.92 |  | 378 | 10 | 381 | 9 | 1 | 398 | 24 |  |
| Age (Ma)* | MSWD† | MSWDcrit§ | |  |  | AS3 age (Ma)# | | | MSWD |  |  |  |  |  |  |  |  |  |  |
| 359.5 ± 6.5 | 2.9 | 1.642 | |  |  | 1083 ± 14 | | | 1.3 |  |  |  |  |  |  |  |  |  |  |
|  |  |  |  |  |  |  |  |  |  |  |  |  |  |  |  |  |  |  |  |
| VP-XI-BL-63, granodiorite | | |  |  |  |  |  |  |  |  |  |  |  |  |  |  |  |  |  |
| 63_3 | 349 | 126 | 2.8 | 0.32 |  | 0.3697 | 0.0167 | 0.0539 | 0.0014 | 0.58 |  | 338 | 9 | 319 | 12 | –6 | 184 | 86 |  |
| 63_22 | 311 | 149 | 2.1 | 0.14 |  | 0.4000 | 0.0142 | 0.0548 | 0.0014 | 0.74 |  | 344 | 9 | 342 | 10 | –1 | 328 | 54 |  |
| 63_25 | 270 | 98 | 2.8 | 0.01 |  | 0.4081 | 0.0140 | 0.0553 | 0.0015 | 0.78 |  | 347 | 9 | 348 | 10 | 0 | 350 | 49 |  |
| 63_29 | 314 | 132 | 2.4 | –0.07 |  | 0.4064 | 0.0133 | 0.0562 | 0.0015 | 0.80 |  | 352 | 9 | 346 | 10 | –2 | 305 | 45 |  |
| 63_27 | 189 | 73 | 2.6 | 0.04 |  | 0.3805 | 0.0218 | 0.0561 | 0.0015 | 0.46 |  | 352 | 9 | 327 | 16 | –7 | 158 | 119 |  |
| 63_30 | 107 | 26 | 4.1 | 0.13 |  | 0.4258 | 0.0181 | 0.0565 | 0.0015 | 0.63 |  | 354 | 9 | 360 | 13 | 2 | 397 | 74 |  |
| 63_19 | 840 | 737 | 1.1 | 0.06 |  | 0.4209 | 0.0120 | 0.0568 | 0.0015 | 0.90 |  | 356 | 9 | 357 | 9 | 0 | 359 | 28 |  |
| 63_20 | 261 | 120 | 2.2 | 0.21 |  | 0.4224 | 0.0158 | 0.0570 | 0.0015 | 0.70 |  | 358 | 9 | 358 | 11 | 0 | 359 | 60 |  |
| 63_8 | 626 | 442 | 1.4 | 0.03 |  | 0.4185 | 0.0127 | 0.0572 | 0.0015 | 0.86 |  | 359 | 9 | 355 | 9 | –1 | 331 | 36 |  |
| 63_1 | 276 | 100 | 2.8 | –0.03 |  | 0.4334 | 0.0152 | 0.0575 | 0.0015 | 0.75 |  | 361 | 9 | 366 | 11 | 1 | 397 | 52 |  |
| 63_2 | 227 | 67 | 3.4 | 0.31 |  | 0.4475 | 0.0157 | 0.0577 | 0.0015 | 0.75 |  | 361 | 9 | 376 | 11 | 4 | 463 | 52 |  |
| 63_11 | 389 | 160 | 2.4 | 0.07 |  | 0.4284 | 0.0139 | 0.0577 | 0.0015 | 0.80 |  | 362 | 9 | 362 | 10 | 0 | 364 | 44 |  |
| 63_7 | 375 | 203 | 1.8 | 0.18 |  | 0.4367 | 0.0139 | 0.0579 | 0.0015 | 0.82 |  | 363 | 9 | 368 | 10 | 1 | 399 | 40 |  |
| 63_18 | 327 | 130 | 2.5 | 0.13 |  | 0.4378 | 0.0144 | 0.0579 | 0.0015 | 0.80 |  | 363 | 9 | 369 | 10 | 2 | 404 | 45 |  |
| 63_17 | 256 | 109 | 2.3 | –0.02 |  | 0.4262 | 0.0153 | 0.0582 | 0.0015 | 0.73 |  | 365 | 9 | 360 | 11 | –1 | 332 | 55 |  |
| 63_4 | 253 | 96 | 2.6 | –0.09 |  | 0.4092 | 0.0158 | 0.0585 | 0.0015 | 0.68 |  | 366 | 9 | 348 | 11 | –5 | 229 | 65 |  |
| 63_16 | 316 | 143 | 2.2 | 0.07 |  | 0.4435 | 0.0149 | 0.0590 | 0.0015 | 0.78 |  | 369 | 9 | 373 | 11 | 1 | 394 | 48 |  |
| 63_6 | 434 | 151 | 2.9 | 0.02 |  | 0.4312 | 0.0145 | 0.0591 | 0.0016 | 0.80 |  | 370 | 10 | 364 | 10 | –2 | 326 | 46 |  |
| 63_5 | 352 | 147 | 2.4 | –0.13 |  | 0.4235 | 0.0154 | 0.0591 | 0.0015 | 0.72 |  | 370 | 9 | 359 | 11 | –3 | 285 | 58 |  |
| 63_24 | 349 | 149 | 2.3 | –0.07 |  | 0.4343 | 0.0145 | 0.0596 | 0.0016 | 0.78 |  | 373 | 9 | 366 | 10 | –2 | 323 | 47 |  |
| 63_10 | 339 | 123 | 2.8 | –0.08 |  | 0.4397 | 0.0143 | 0.0597 | 0.0016 | 0.80 |  | 374 | 9 | 370 | 10 | –1 | 347 | 44 |  |
| 63_13 | 265 | 102 | 2.6 | 0.13 |  | 0.4389 | 0.0178 | 0.0598 | 0.0016 | 0.65 |  | 374 | 10 | 369 | 13 | –1 | 340 | 70 |  |
| 63_15 | 278 | 102 | 2.7 | –0.30 |  | 0.4170 | 0.0156 | 0.0602 | 0.0016 | 0.70 |  | 377 | 10 | 354 | 11 | –6 | 205 | 62 |  |
| 63_9 | 398 | 239 | 1.7 | 0.03 |  | 0.4521 | 0.0146 | 0.0611 | 0.0016 | 0.81 |  | 382 | 10 | 379 | 10 | –1 | 357 | 43 |  |
| Age (Ma)* | MSWD† | MSWDcrit§ | |  |  | AS3 age (Ma)# | | | MSWD |  |  |  |  |  |  |  |  |  |  |
| 361.6 ± 3.8 | 1.4 | 1.657 | |  |  | 1083 ± 14 | | | 1.3 |  |  |  |  |  |  |  |  |  |  |
|  |  |  |  |  |  |  |  |  |  |  |  |  |  |  |  |  |  |  |  |
| VP-XI-BL-64, granite | | |  |  |  |  |  |  |  |  |  |  |  |  |  |  |  |  |  |
| 64_7 | 352 | 171 | 2.1 | 0.25 |  | 0.3998 | 0.0141 | 0.0537 | 0.0014 | 0.76 |  | 337 | 9 | 341 | 10 | 1 | 369 | 51 |  |
| 64_4 | 294 | 153 | 1.9 | 0.10 |  | 0.4113 | 0.0156 | 0.0551 | 0.0017 | 0.81 |  | 346 | 10 | 350 | 11 | 1 | 378 | 50 |  |
| 64_20 | 348 | 122 | 2.8 | 0.12 |  | 0.4259 | 0.0141 | 0.0566 | 0.0015 | 0.79 |  | 355 | 9 | 360 | 10 | 1 | 394 | 45 |  |
| 64_26 | 266 | 76 | 3.5 | 0.22 |  | 0.4226 | 0.0173 | 0.0572 | 0.0015 | 0.65 |  | 359 | 9 | 358 | 12 | 0 | 352 | 70 |  |
| 64_14 | 203 | 66 | 3.1 | 0.09 |  | 0.4226 | 0.0156 | 0.0574 | 0.0015 | 0.71 |  | 360 | 9 | 358 | 11 | –1 | 346 | 59 |  |
| 64_1 | 418 | 110 | 3.8 | 0.03 |  | 0.4166 | 0.0138 | 0.0574 | 0.0015 | 0.79 |  | 360 | 9 | 354 | 10 | –2 | 315 | 46 |  |
| 64_8 | 246 | 109 | 2.3 | 0.05 |  | 0.4115 | 0.0155 | 0.0574 | 0.0015 | 0.70 |  | 360 | 9 | 350 | 11 | –3 | 284 | 62 |  |
| 64_18 | 274 | 147 | 1.9 | 0.09 |  | 0.4233 | 0.0152 | 0.0580 | 0.0015 | 0.73 |  | 363 | 9 | 358 | 11 | –1 | 327 | 56 |  |
| 64_17 | 628 | 147 | 4.3 | 0.22 |  | 0.4167 | 0.0144 | 0.0579 | 0.0015 | 0.75 |  | 363 | 9 | 354 | 10 | –3 | 292 | 52 |  |
| 64_9 | 356 | 109 | 3.3 | 0.13 |  | 0.4288 | 0.0148 | 0.0582 | 0.0015 | 0.76 |  | 364 | 9 | 362 | 11 | –1 | 349 | 51 |  |
| 64_16 | 223 | 76 | 2.9 | 0.09 |  | 0.4231 | 0.0183 | 0.0582 | 0.0015 | 0.61 |  | 365 | 9 | 358 | 13 | –2 | 317 | 78 |  |
| 64_28 | 257 | 107 | 2.4 | –0.03 |  | 0.4313 | 0.0146 | 0.0583 | 0.0016 | 0.79 |  | 366 | 10 | 364 | 10 | 0 | 355 | 47 |  |
| 64_15 | 320 | 112 | 2.9 | 0.12 |  | 0.4343 | 0.0162 | 0.0589 | 0.0016 | 0.74 |  | 369 | 10 | 366 | 11 | –1 | 349 | 57 |  |
| 64_21 | 401 | 114 | 3.5 | 0.14 |  | 0.4432 | 0.0145 | 0.0592 | 0.0015 | 0.80 |  | 371 | 9 | 373 | 10 | 1 | 384 | 44 |  |
| 64_10 | 353 | 184 | 1.9 | –0.01 |  | 0.4332 | 0.0141 | 0.0591 | 0.0015 | 0.80 |  | 370 | 9 | 365 | 10 | –1 | 335 | 44 |  |
| 64_2 | 277 | 124 | 2.2 | –0.20 |  | 0.4169 | 0.0155 | 0.0590 | 0.0017 | 0.78 |  | 370 | 10 | 354 | 11 | –4 | 251 | 54 |  |
| 64_11 | 360 | 174 | 2.1 | –0.05 |  | 0.4377 | 0.0138 | 0.0592 | 0.0015 | 0.83 |  | 371 | 9 | 369 | 10 | –1 | 355 | 40 |  |
| 64_27 | 234 | 74 | 3.1 | 0.13 |  | 0.4438 | 0.0155 | 0.0593 | 0.0016 | 0.75 |  | 371 | 9 | 373 | 11 | 0 | 382 | 52 |  |
| 64_5 | 350 | 132 | 2.7 | –0.16 |  | 0.4246 | 0.0142 | 0.0593 | 0.0016 | 0.78 |  | 372 | 9 | 359 | 10 | –3 | 281 | 48 |  |
| 64_13 | 184 | 67 | 2.8 | 0.03 |  | 0.4291 | 0.0182 | 0.0598 | 0.0016 | 0.62 |  | 374 | 10 | 363 | 13 | –3 | 288 | 76 |  |
| 64_30 | 211 | 68 | 3.1 | 0.16 |  | 0.4523 | 0.0172 | 0.0600 | 0.0016 | 0.71 |  | 376 | 10 | 379 | 12 | 1 | 398 | 60 |  |
| 64_25 | 235 | 87 | 2.7 | 0.14 |  | 0.4581 | 0.0159 | 0.0601 | 0.0016 | 0.76 |  | 376 | 10 | 383 | 11 | 2 | 423 | 51 |  |
| 64_23 | 362 | 192 | 1.9 | –0.05 |  | 0.4403 | 0.0141 | 0.0600 | 0.0016 | 0.82 |  | 376 | 10 | 370 | 10 | –1 | 338 | 42 |  |
| 64_6 | 326 | 94 | 3.5 | –0.27 |  | 0.4177 | 0.0162 | 0.0600 | 0.0016 | 0.68 |  | 375 | 10 | 354 | 12 | –6 | 219 | 66 |  |
| 64_24 | 681 | 295 | 2.3 | 0.11 |  | 0.4436 | 0.0143 | 0.0606 | 0.0016 | 0.81 |  | 379 | 10 | 373 | 10 | –2 | 331 | 43 |  |
| 64_22 | 274 | 84 | 3.3 | –0.10 |  | 0.4291 | 0.0160 | 0.0605 | 0.0016 | 0.71 |  | 379 | 10 | 363 | 11 | –4 | 260 | 61 |  |
| 64_12 | 192 | 67 | 2.9 | –0.13 |  | 0.4291 | 0.0186 | 0.0610 | 0.0016 | 0.62 |  | 381 | 10 | 363 | 13 | –5 | 243 | 78 |  |
| 64_19 | 936 | 616 | 1.5 | –0.11 |  | 0.4501 | 0.0134 | 0.0612 | 0.0016 | 0.87 |  | 383 | 10 | 377 | 9 | –1 | 344 | 33 |  |
| Age (Ma)* | MSWD† | MSWDcrit§ | |  |  | AS3 age (Ma)# | | | MSWD |  |  |  |  |  |  |  |  |  |  |
| 367.2 ± 3.6 | 1.2 | ~1.600 | |  |  | 1083 ± 14 | | | 1.3 |  |  |  |  |  |  |  |  |  |  |
|  |  |  |  |  |  |  |  |  |  |  |  |  |  |  |  |  |  |  |  |
| VP-XII-SB-03, Wolf Creek stock granite | | | | |  |  |  |  |  |  |  |  |  |  |  |  |  |  |  |
| 03_8 | 388 | 152 | 2.5 | –0.03 |  | 0.3816 | 0.0117 | 0.0535 | 0.0012 | 0.72 |  | 336 | 7 | 328 | 9 | –2 | 273 | 49 |  |
| 03_9 | 429 | 154 | 2.8 | 0.21 |  | 0.4077 | 0.0123 | 0.0548 | 0.0012 | 0.74 |  | 344 | 7 | 347 | 9 | 1 | 369 | 46 |  |
| 03_10 | 383 | 163 | 2.4 | 0.05 |  | 0.4085 | 0.0117 | 0.0550 | 0.0012 | 0.77 |  | 345 | 7 | 348 | 8 | 1 | 364 | 41 |  |
| 03_2 | 306 | 116 | 2.6 | 0.22 |  | 0.4065 | 0.0139 | 0.0551 | 0.0012 | 0.66 |  | 346 | 8 | 346 | 10 | 0 | 350 | 58 |  |
| 03_01 | 273 | 117 | 2.3 | 0.06 |  | 0.3891 | 0.0171 | 0.0552 | 0.0012 | 0.51 |  | 346 | 8 | 334 | 13 | –4 | 247 | 87 |  |
| 03_4 | 487 | 165 | 2.9 | 0.19 |  | 0.4123 | 0.0118 | 0.0554 | 0.0012 | 0.77 |  | 347 | 7 | 351 | 8 | 1 | 371 | 41 |  |
| 03_13 | 288 | 98 | 2.9 | 0.06 |  | 0.4130 | 0.0120 | 0.0555 | 0.0012 | 0.77 |  | 348 | 8 | 351 | 9 | 1 | 370 | 42 |  |
| 03_30 | 409 | 121 | 3.4 | 0.26 |  | 0.4135 | 0.0129 | 0.0557 | 0.0012 | 0.71 |  | 349 | 7 | 351 | 9 | 1 | 366 | 50 |  |
| 03_11 | 297 | 136 | 2.2 | 0.41 |  | 0.3973 | 0.0204 | 0.0556 | 0.0013 | 0.44 |  | 349 | 8 | 340 | 15 | –3 | 279 | 106 |  |
| 03_28 | 228 | 71 | 3.2 | 0.10 |  | 0.4187 | 0.0139 | 0.0559 | 0.0013 | 0.70 |  | 351 | 8 | 355 | 10 | 1 | 383 | 54 |  |
| 03_3 | 271 | 102 | 2.6 | 0.04 |  | 0.3969 | 0.0156 | 0.0561 | 0.0013 | 0.57 |  | 352 | 8 | 339 | 11 | –4 | 253 | 74 |  |
| 03_17 | 405 | 144 | 2.8 | 0.15 |  | 0.4174 | 0.0127 | 0.0565 | 0.0013 | 0.73 |  | 354 | 8 | 354 | 9 | 0 | 353 | 47 |  |
| 03_32 | 442 | 123 | 3.6 | 0.05 |  | 0.4138 | 0.0128 | 0.0567 | 0.0013 | 0.71 |  | 356 | 8 | 352 | 9 | –1 | 325 | 49 |  |
| 03_23 | 485 | 257 | 1.9 | 0.09 |  | 0.4261 | 0.0114 | 0.0568 | 0.0012 | 0.82 |  | 356 | 8 | 360 | 8 | 1 | 387 | 34 |  |
| 03_16 | 410 | 122 | 3.4 | 0.34 |  | 0.4433 | 0.0124 | 0.0570 | 0.0013 | 0.79 |  | 357 | 8 | 373 | 9 | 4 | 468 | 38 |  |
| 03_14 | 468 | 232 | 2.0 | –0.01 |  | 0.4177 | 0.0117 | 0.0571 | 0.0013 | 0.79 |  | 358 | 8 | 354 | 8 | –1 | 332 | 39 |  |
| 03_21 | 595 | 191 | 3.1 | 0.17 |  | 0.4209 | 0.0151 | 0.0575 | 0.0013 | 0.61 |  | 360 | 8 | 357 | 11 | –1 | 333 | 64 |  |
| 03_26 | 298 | 149 | 2.0 | –0.04 |  | 0.4200 | 0.0132 | 0.0578 | 0.0013 | 0.71 |  | 362 | 8 | 356 | 9 | –2 | 316 | 50 |  |
| 03_12 | 359 | 117 | 3.1 | 0.00 |  | 0.4221 | 0.0142 | 0.0583 | 0.0013 | 0.66 |  | 365 | 8 | 358 | 10 | –2 | 308 | 58 |  |
| 03_20 | 322 | 106 | 3.0 | –0.05 |  | 0.4317 | 0.0136 | 0.0592 | 0.0014 | 0.72 |  | 371 | 8 | 364 | 10 | –2 | 323 | 50 |  |
| Age (Ma)* | MSWD† | MSWDcrit§ | |  |  |  | |  |  |  |  |  |  |  |  |  |  |  |  |
| 352.3 ± 3.4 | 1.14 | 1.732 | |  |  |  |  |  |  |  |  |  |  |  |  |  |  |  |  |
|  |  |  |  |  |  |  |  |  |  |  |  |  |  |  |  |  |  |  |  |
| VP-XII-SB-07, felsic dike | | |  |  |  |  |  |  |  |  |  |  |  |  |  |  |  |  |  |
| 7.7 | 379 | 168 | 2.3 | 0.41 |  | 0.0247 | 0.0562 | 0.0007 | 0.2100 | 0.05 |  | 353 | 4 | 348 | 18 | –1 | 319 | 134 |  |
| 7.9 | 708 | 345 | 2.0 | 0.39 |  | 0.0125 | 0.0566 | 0.0007 | 0.3800 | 0.05 |  | 355 | 4 | 338 | 9 | –5 | 223 | 68 |  |
| 7.3 | 368 | 160 | 2.3 | 0.42 |  | 0.0089 | 0.0568 | 0.0008 | 0.6800 | 0.05 |  | 356 | 5 | 354 | 6 | –1 | 340 | 35 |  |
| 7.11 | 281 | 79 | 3.5 | 0.41 |  | 0.0078 | 0.0568 | 0.0007 | 0.6600 | 0.05 |  | 356 | 4 | 349 | 6 | –2 | 300 | 33 |  |
| 7.1 | 245 | 86 | 2.9 | 0.42 |  | 0.0086 | 0.0571 | 0.0008 | 0.7000 | 0.05 |  | 358 | 5 | 357 | 6 | 0 | 347 | 33 |  |
| 7.8 | 2644 | 1337 | 2.0 | 0.43 |  | 0.0068 | 0.0574 | 0.0009 | 0.9600 | 0.05 |  | 360 | 5 | 361 | 5 | 0 | 370 | 10 |  |
| 7.5 | 401 | 114 | 3.5 | 0.42 |  | 0.0101 | 0.0576 | 0.0009 | 0.6900 | 0.05 |  | 361 | 6 | 360 | 7 | 0 | 348 | 39 |  |
| 7.1 | 348 | 114 | 3.0 | 0.43 |  | 0.0097 | 0.0578 | 0.0010 | 0.7900 | 0.05 |  | 362 | 6 | 361 | 7 | 0 | 350 | 31 |  |
| 7.2 | 479 | 163 | 2.9 | 0.42 |  | 0.0086 | 0.0579 | 0.0009 | 0.7700 | 0.05 |  | 363 | 6 | 356 | 6 | –2 | 314 | 30 |  |
| 7.4 | 532 | 243 | 2.2 | 0.44 |  | 0.0090 | 0.0590 | 0.0010 | 0.7900 | 0.05 |  | 369 | 6 | 369 | 6 | 0 | 366 | 29 |  |
| Age (Ma)* | MSWD† | MSWDcrit§ | |  |  | AS3 age (Ma)# | | | MSWD |  |  |  |  |  |  |  |  |  |  |
| 358.3 ± 3.1 | 0.85 | 2.111 | |  |  | 1108 ± 18 | | | 3.0 |  |  |  |  |  |  |  |  |  |  |
|  |  |  |  |  |  |  |  |  |  |  |  |  |  |  |  |  |  |  |  |
| VP-XII-SB-08, felsic dike | | |  |  |  |  |  |  |  |  |  |  |  |  |  |  |  |  |  |
| 08_4 | 485 | 236 | 2.1 | 0.18 |  | 0.4055 | 0.0129 | 0.0556 | 0.0012 | 0.70 |  | 349 | 8 | 346 | 9 | –1 | 326 | 52 |  |
| 08_15 | 425 | 143 | 3.0 | 0.15 |  | 0.4258 | 0.0119 | 0.0568 | 0.0013 | 0.79 |  | 356 | 8 | 360 | 9 | 1 | 385 | 39 |  |
| 08_2 | 341 | 125 | 2.7 | –0.10 |  | 0.4158 | 0.0122 | 0.0570 | 0.0013 | 0.76 |  | 358 | 8 | 353 | 9 | –1 | 323 | 43 |  |
| 08_01 | 236 | 84 | 2.8 | 0.21 |  | 0.4395 | 0.0134 | 0.0575 | 0.0013 | 0.74 |  | 360 | 8 | 370 | 9 | 3 | 430 | 45 |  |
| 08_22 | 589 | 224 | 2.6 | 0.28 |  | 0.4067 | 0.0189 | 0.0576 | 0.0013 | 0.48 |  | 361 | 8 | 346 | 14 | –4 | 251 | 94 |  |
| 08_27 | 432 | 131 | 3.3 | 0.12 |  | 0.4289 | 0.0132 | 0.0579 | 0.0013 | 0.72 |  | 363 | 8 | 362 | 9 | 0 | 359 | 48 |  |
| 08_26 | 435 | 172 | 2.5 | 0.09 |  | 0.4325 | 0.0124 | 0.0581 | 0.0013 | 0.77 |  | 364 | 8 | 365 | 9 | 0 | 370 | 41 |  |
| 08_24 | 275 | 97 | 2.8 | 0.16 |  | 0.4457 | 0.0139 | 0.0585 | 0.0013 | 0.73 |  | 367 | 8 | 374 | 10 | 2 | 421 | 48 |  |
| 08_8 | 349 | 150 | 2.3 | –0.06 |  | 0.4317 | 0.0126 | 0.0586 | 0.0013 | 0.77 |  | 367 | 8 | 364 | 9 | –1 | 348 | 43 |  |
| 08_17 | 454 | 138 | 3.3 | 0.19 |  | 0.4457 | 0.0132 | 0.0588 | 0.0013 | 0.74 |  | 368 | 8 | 374 | 9 | 2 | 412 | 45 |  |
| 08_18 | 292 | 99 | 3.0 | –0.10 |  | 0.4170 | 0.0139 | 0.0586 | 0.0013 | 0.67 |  | 367 | 8 | 354 | 10 | –4 | 268 | 57 |  |
| 08_28 | 294 | 99 | 3.0 | 0.11 |  | 0.4475 | 0.0135 | 0.0589 | 0.0013 | 0.74 |  | 369 | 8 | 376 | 10 | 2 | 418 | 45 |  |
| 08_6 | 471 | 142 | 3.3 | 0.08 |  | 0.4472 | 0.0119 | 0.0593 | 0.0013 | 0.83 |  | 372 | 8 | 375 | 8 | 1 | 398 | 34 |  |
| 08_14 | 401 | 145 | 2.8 | –0.11 |  | 0.4267 | 0.0125 | 0.0592 | 0.0013 | 0.75 |  | 371 | 8 | 361 | 9 | –3 | 297 | 44 |  |
| 08_25 | 562 | 181 | 3.1 | –0.05 |  | 0.4316 | 0.0133 | 0.0594 | 0.0013 | 0.71 |  | 372 | 8 | 364 | 9 | –2 | 315 | 49 |  |
| 08_23 | 265 | 78 | 3.4 | 0.25 |  | 0.4504 | 0.0148 | 0.0596 | 0.0014 | 0.69 |  | 373 | 8 | 378 | 10 | 1 | 403 | 53 |  |
| 08_9 | 612 | 272 | 2.3 | 0.21 |  | 0.4444 | 0.0129 | 0.0596 | 0.0013 | 0.75 |  | 373 | 8 | 373 | 9 | 0 | 374 | 43 |  |
| 08_3 | 548 | 191 | 2.9 | –0.04 |  | 0.4383 | 0.0116 | 0.0596 | 0.0013 | 0.83 |  | 373 | 8 | 369 | 8 | –1 | 342 | 33 |  |
| 08_12 | 517 | 249 | 2.1 | 0.04 |  | 0.4465 | 0.0124 | 0.0600 | 0.0013 | 0.80 |  | 376 | 8 | 375 | 9 | 0 | 368 | 38 |  |
| 08_7 | 163 | 56 | 2.9 | 0.18 |  | 0.3984 | 0.0277 | 0.0597 | 0.0014 | 0.34 |  | 374 | 9 | 341 | 20 | –9 | 120 | 154 |  |
| 08_10 | 363 | 122 | 3.0 | –0.13 |  | 0.4221 | 0.0152 | 0.0599 | 0.0014 | 0.62 |  | 375 | 8 | 358 | 11 | –5 | 244 | 65 |  |
| 08_5 | 300 | 89 | 3.4 | 0.04 |  | 0.4086 | 0.0228 | 0.0603 | 0.0014 | 0.41 |  | 378 | 8 | 348 | 16 | –8 | 153 | 119 |  |
| Age (Ma)* | MSWD† | MSWDcrit§ | |  |  |  | |  |  |  |  |  |  |  |  |  |  |  |  |
| 367.2 ± 3.4 | 0.88 | 1.690 | |  |  |  |  |  |  |  |  |  |  |  |  |  |  |  |  |
|  |  |  |  |  |  |  |  |  |  |  |  |  |  |  |  |  |  |  |  |
| VP-XII-SB-10, felsic dike | | |  |  |  |  |  |  |  |  |  |  |  |  |  |  |  |  |  |
| 10_2 | 212 | 69 | 3.1 | 0.12 |  | 0.3777 | 0.0184 | 0.0549 | 0.0011 | 0.42 |  | 345 | 7 | 325 | 14 | –6 | 189 | 103 |  |
| 10_17 | 159 | 49 | 3.2 | 0.35 |  | 0.4169 | 0.0159 | 0.0560 | 0.0011 | 0.54 |  | 351 | 7 | 354 | 11 | 1 | 373 | 72 |  |
| 10_6 | 231 | 68 | 3.4 | 0.05 |  | 0.4419 | 0.0160 | 0.0566 | 0.0011 | 0.55 |  | 355 | 7 | 372 | 11 | 5 | 477 | 67 |  |
| 10_10 | 542 | 327 | 1.7 | 0.07 |  | 0.4209 | 0.0100 | 0.0570 | 0.0011 | 0.80 |  | 357 | 7 | 357 | 7 | 0 | 352 | 32 |  |
| 10_20 | 187 | 68 | 2.7 | –0.08 |  | 0.4165 | 0.0129 | 0.0569 | 0.0012 | 0.68 |  | 357 | 7 | 354 | 9 | –1 | 331 | 52 |  |
| 10_8 | 181 | 57 | 3.2 | –0.22 |  | 0.4076 | 0.0127 | 0.0570 | 0.0012 | 0.65 |  | 357 | 7 | 347 | 9 | –3 | 281 | 54 |  |
| 10_33rim | 324 | 137 | 2.4 | 0.34 |  | 0.4219 | 0.0151 | 0.0572 | 0.0011 | 0.54 |  | 358 | 7 | 357 | 11 | 0 | 351 | 68 |  |
| 10_15 | 398 | 150 | 2.7 | 0.12 |  | 0.4112 | 0.0134 | 0.0575 | 0.0011 | 0.60 |  | 360 | 7 | 350 | 10 | –3 | 280 | 60 |  |
| 10_5 | 287 | 120 | 2.4 | 0.19 |  | 0.4393 | 0.0117 | 0.0576 | 0.0011 | 0.74 |  | 361 | 7 | 370 | 8 | 2 | 424 | 40 |  |
| 10_3 | 248 | 72 | 3.4 | –0.22 |  | 0.4346 | 0.0184 | 0.0580 | 0.0012 | 0.47 |  | 364 | 7 | 366 | 13 | 1 | 385 | 84 |  |
| 10_7 | 310 | 134 | 2.3 | –0.04 |  | 0.4234 | 0.0111 | 0.0582 | 0.0011 | 0.74 |  | 365 | 7 | 358 | 8 | –2 | 318 | 40 |  |
| 10_13 | 175 | 46 | 3.8 | 0.24 |  | 0.4405 | 0.0154 | 0.0585 | 0.0012 | 0.59 |  | 367 | 7 | 371 | 11 | 1 | 395 | 63 |  |
| 10_25 | 383 | 144 | 2.7 | –0.07 |  | 0.4314 | 0.0106 | 0.0587 | 0.0011 | 0.79 |  | 367 | 7 | 364 | 8 | –1 | 344 | 34 |  |
| 10_31 | 236 | 51 | 4.6 | –0.02 |  | 0.4224 | 0.0133 | 0.0586 | 0.0012 | 0.63 |  | 367 | 7 | 358 | 9 | –3 | 297 | 56 |  |
| 10_12 | 264 | 97 | 2.7 | –0.01 |  | 0.4255 | 0.0140 | 0.0591 | 0.0012 | 0.60 |  | 370 | 7 | 360 | 10 | –3 | 295 | 60 |  |
| 10_9 | 275 | 99 | 2.8 | 0.11 |  | 0.4413 | 0.0122 | 0.0591 | 0.0012 | 0.71 |  | 370 | 7 | 371 | 9 | 0 | 378 | 44 |  |
| 10_24 | 239 | 73 | 3.3 | 0.11 |  | 0.4322 | 0.0148 | 0.0592 | 0.0012 | 0.58 |  | 371 | 7 | 365 | 10 | –2 | 327 | 63 |  |
| 10_30 | 221 | 63 | 3.5 | 0.03 |  | 0.4564 | 0.0141 | 0.0593 | 0.0012 | 0.64 |  | 371 | 7 | 382 | 10 | 3 | 446 | 53 |  |
| 10_1 | 328 | 170 | 1.9 | 0.11 |  | 0.4443 | 0.0118 | 0.0594 | 0.0012 | 0.73 |  | 372 | 7 | 373 | 8 | 0 | 383 | 40 |  |
| 10_16 | 456 | 193 | 2.4 | 0.04 |  | 0.4398 | 0.0109 | 0.0594 | 0.0011 | 0.78 |  | 372 | 7 | 370 | 8 | –1 | 358 | 35 |  |
| 10_18 | 252 | 117 | 2.2 | –0.02 |  | 0.4434 | 0.0124 | 0.0596 | 0.0012 | 0.71 |  | 373 | 7 | 373 | 9 | 0 | 368 | 44 |  |
| 10_21 | 333 | 117 | 2.9 | –0.10 |  | 0.4288 | 0.0121 | 0.0596 | 0.0012 | 0.69 |  | 373 | 7 | 362 | 9 | –3 | 294 | 47 |  |
| 10_35rim | 644 | 403 | 1.6 | 0.70 |  | 0.4400 | 0.0155 | 0.0598 | 0.0012 | 0.55 |  | 374 | 7 | 370 | 11 | –1 | 344 | 67 |  |
| 10_32rim | 349 | 136 | 2.6 | 0.21 |  | 0.4607 | 0.0119 | 0.0599 | 0.0012 | 0.76 |  | 375 | 7 | 385 | 8 | 3 | 443 | 37 |  |
| 10_4 | 379 | 167 | 2.3 | 0.17 |  | 0.4528 | 0.0115 | 0.0601 | 0.0012 | 0.76 |  | 376 | 7 | 379 | 8 | 1 | 396 | 37 |  |
| 10_19 | 336 | 133 | 2.5 | –0.01 |  | 0.4336 | 0.0157 | 0.0603 | 0.0012 | 0.55 |  | 377 | 7 | 366 | 11 | –3 | 292 | 69 |  |
| 10_23 | 443 | 195 | 2.3 | –0.08 |  | 0.4450 | 0.0106 | 0.0603 | 0.0012 | 0.80 |  | 377 | 7 | 374 | 7 | –1 | 352 | 32 |  |
| 10_14 | 360 | 196 | 1.8 | 0.13 |  | 0.4548 | 0.0117 | 0.0606 | 0.0012 | 0.75 |  | 379 | 7 | 381 | 8 | 0 | 389 | 38 |  |
| 10_27 | 373 | 179 | 2.1 | 0.04 |  | 0.4479 | 0.0120 | 0.0607 | 0.0012 | 0.72 |  | 380 | 7 | 376 | 8 | –1 | 350 | 42 |  |
| 10_22 | 520 | 225 | 2.3 | 0.05 |  | 0.4561 | 0.0109 | 0.0610 | 0.0012 | 0.80 |  | 381 | 7 | 382 | 8 | 0 | 382 | 32 |  |
| 10_29 | 844 | 416 | 2.0 | –0.16 |  | 0.4356 | 0.0101 | 0.0610 | 0.0011 | 0.81 |  | 381 | 7 | 367 | 7 | –4 | 278 | 32 |  |
| 10_26 | 272 | 96 | 2.9 | –0.03 |  | 0.4491 | 0.0124 | 0.0610 | 0.0012 | 0.71 |  | 382 | 7 | 377 | 9 | –1 | 345 | 44 |  |
| 10_34rim | 899 | 616 | 1.5 | 0.29 |  | 0.4567 | 0.0161 | 0.0610 | 0.0012 | 0.55 |  | 382 | 7 | 382 | 11 | 0 | 384 | 66 |  |
| 10_11 | 672 | 349 | 1.9 | –0.07 |  | 0.4533 | 0.0101 | 0.0612 | 0.0012 | 0.85 |  | 383 | 7 | 380 | 7 | –1 | 360 | 27 |  |
| 10_28 | 630 | 330 | 1.9 | 0.04 |  | 0.4581 | 0.0109 | 0.0616 | 0.0012 | 0.80 |  | 386 | 7 | 383 | 8 | –1 | 367 | 32 |  |
| Age (Ma)* | MSWD† | MSWDcrit§ | |  |  |  | |  |  |  |  |  |  |  |  |  |  |  |  |
| 369.4 ± 3.5 | 2.1 | 1.51 | |  |  |  |  |  |  |  |  |  |  |  |  |  |  |  |  |
|  |  |  |  |  |  |  |  |  |  |  |  |  |  |  |  |  |  |  |  |
| VP-XI-BL-40, siliceous tuff from member A of the Sierra Buttes Fm. | | | | |  |  |  |  |  |  |  |  |  |  |  |  |  |  |  |
| 40.2 | 288 | 108 | 2.7 | 0.92 |  | 0.3879 | 0.0189 | 0.0538 | 0.0019 | 0.72 |  | 338 | 12 | 333 | 14 | –1 | 298 | 77 |  |
| 40.4 | 422 | 221 | 1.9 | 0.53 |  | 0.4098 | 0.0172 | 0.0556 | 0.0021 | 0.89 |  | 349 | 13 | 349 | 12 | 0 | 346 | 43 |  |
| 40.7 | 176 | 72 | 2.5 | 0.34 |  | 0.3853 | 0.0196 | 0.0559 | 0.0019 | 0.65 |  | 350 | 11 | 331 | 14 | –6 | 195 | 89 |  |
| 40.1 | 102 | 28 | 3.6 | –0.21 |  | 0.3687 | 0.0217 | 0.0577 | 0.0020 | 0.57 |  | ~~362~~ | ~~12~~ | ~~319~~ | ~~16~~ | ~~–12~~ | ~~14~~ | ~~116~~ | ~~high disc.~~ |
| 40.9 | 571 | 291 | 2.0 | 1.02 |  | 0.3926 | 0.0592 | 0.0583 | 0.0021 | 0.24 |  | 365 | 13 | 336 | 43 | –8 | 139 | 343 |  |
| 40.8 | 223 | 70 | 3.2 | 0.73 |  | 0.4273 | 0.0232 | 0.0586 | 0.0020 | 0.61 |  | 367 | 12 | 361 | 17 | –2 | 321 | 98 |  |
| 40.12 | 823 | 545 | 1.5 | 0.46 |  | 0.4360 | 0.0166 | 0.0586 | 0.0021 | 0.92 |  | 367 | 12 | 367 | 12 | 0 | 370 | 33 |  |
| 40.11 | 371 | 143 | 2.6 | –0.03 |  | 0.4177 | 0.0174 | 0.0587 | 0.0022 | 0.88 |  | 368 | 13 | 354 | 12 | –4 | 268 | 45 |  |
| 40.3 | 1085 | 606 | 1.8 | 0.27 |  | 0.4390 | 0.0168 | 0.0589 | 0.0021 | 0.95 |  | 369 | 13 | 370 | 12 | 0 | 374 | 28 |  |
| 40.6 | 785 | 548 | 1.4 | 0.17 |  | 0.4395 | 0.0160 | 0.0588 | 0.0021 | 0.96 |  | 369 | 13 | 370 | 11 | 0 | 377 | 22 |  |
| 40.14 | 790 | 351 | 2.3 | 0.04 |  | 0.4360 | 0.0170 | 0.0601 | 0.0022 | 0.95 |  | 376 | 14 | 367 | 12 | –2 | 311 | 28 |  |
| 40.13 | 374 | 132 | 2.8 | –0.05 |  | 0.4376 | 0.0173 | 0.0619 | 0.0020 | 0.84 |  | 387 | 12 | 369 | 12 | –5 | 254 | 50 |  |
| Age (Ma)* | MSWD† | MSWDcrit§ | |  |  |  | |  |  |  |  |  |  |  |  |  |  |  |  |
| 363.3 ± 9.4 | 1.3 | 1.991 | |  |  |  |  |  |  |  |  |  |  |  |  |  |  |  |  |
| *Weighted average 204Pb-corrected 206Pb/238U age at 95% confidence.  †MSWD—mean square of weighted deviation.  §Values from table 1 *in* Mahon (1996). MSWDcri—critical mean square weighted deviation value, corresponding to the degree of freedom = 9.  #Secondary standard (AS3 Duluth Complex gabbro) weighted average 204Pb-corrected 207Pb/206Pb age at 95% confidence. | | | | | | | | | | | | | | | | | | | |
