# Supplementary material
Source: publisher figshare collection journal article supplement (https://gsapubs.figshare.com/ndownloader/files/22411893)
Supplement: Supplementary file 1 [file 22411893 › 2105_SuppItem5.docx]

| SUPPLEMENTAL ITEM 5. LASER-ABLATION–INDUCTIVELY COUPLED PLASMA–MASS SPECTROMETRY (LA-ICP-MS) ANALYTICAL U-Th-Pb DATA FOR DETRITAL ZIRCONS FROM THE SANDSTONE SAMPLE, SIERRA CITY MÉLANGE | | | | | | | | | | | | | | | | | | | | | | | | | | | | | | | | | | |
| --- | --- | --- | --- | --- | --- | --- | --- | --- | --- | --- | --- | --- | --- | --- | --- | --- | --- | --- | --- | --- | --- | --- | --- | --- | --- | --- | --- | --- | --- | --- | --- | --- | --- | --- |
|  | Isotopic ratios | | | | | | | | | | | | | | Ages | | | | | | | | | | | | | | | | | | | |
| Analysis | 208Pb  /232Th | ±1σ (abs) | | 207Pb  /206Pb | ±1σ (abs) | | 207Pb  /235U | ±1σ (abs) | | 206Pb  /238U | ±1σ (abs) | | Corr. coefficients | | 208Pb  /232Th | ±1σ (abs) | | 207Pb  /206Pb | ±1σ (abs) | | 207Pb  /235U | ±1σ (abs) | | 206Pb  /238U | ±1σ (abs) | | Discordance† | | Passed filters?§ | Best age system# | Best age (Ma) | ±1σ (abs) | | |
|  |  | int* | prop* |  | int* | prop* |  | int* | prop* |  | int* | prop* | 207/235-206/238 | 206/238-207/206 | (Ma) | int* | prop* | (Ma) | int* | prop* | (Ma) | int* | prop* | (Ma) | int* | prop* | 207/206- 206/238 | 207/235- 206/238 |  |  |  | int* | prop* | |
| VPXIIIBL11_1 | 0.0205 | 0.0003 | 0.0021 | 0.0534 | 0.0008 | 0.0015 | 0.4670 | 0.0070 | 0.0305 | 0.0634 | 0.0004 | 0.0040 | 0.28 | 0.16 | 411 | 5 | 43 | 340 | 32 | 64 | 389 | 7 | 31 | 396 | 3 | 26 | -17% | -2% | Yes | 206Pb/238U | 396 | 3 | 26 | |
| VPXIIIBL11_10 | 0.0224 | 0.0003 | 0.0025 | 0.0576 | 0.0009 | 0.0016 | 0.5460 | 0.0075 | 0.0335 | 0.0668 | 0.0006 | 0.0042 | 0.17 | 0.31 | 448 | 5 | 50 | 510 | 32 | 61 | 442 | 8 | 34 | 417 | 4 | 27 | 18% | 6% | Yes | " | 417 | 4 | 27 | |
| VPXIIIBL11_11 | 0.0191 | 0.0002 | 0.0020 | 0.0571 | 0.0005 | 0.0015 | 0.5005 | 0.0044 | 0.0300 | 0.0626 | 0.0003 | 0.0038 | 0.35 | 0.24 | 383 | 4 | 41 | 490 | 19 | 56 | 412 | 4 | 30 | 391 | 2 | 24 | 20% | 5% | Yes | " | 391 | 2 | 24 | |
| VPXIIIBL11_12 | 0.0227 | 0.0006 | 0.0024 | 0.0567 | 0.0013 | 0.0019 | 0.5400 | 0.0115 | 0.0340 | 0.0675 | 0.0010 | 0.0042 | 0.24 | 0.35 | 455 | 11 | 49 | 475 | 51 | 72 | 438 | 12 | 35 | 421 | 6 | 27 | 11% | 4% | Yes | " | 421 | 6 | 27 | |
| VPXIIIBL11_13 | 0.0234 | 0.0003 | 0.0024 | 0.0568 | 0.0007 | 0.0016 | 0.5470 | 0.0070 | 0.0335 | 0.0692 | 0.0005 | 0.0042 | 0.38 | 0.22 | 468 | 6 | 49 | 480 | 27 | 60 | 443 | 7 | 34 | 431 | 3 | 27 | 10% | 3% | Yes | " | 431 | 3 | 27 | |
| VPXIIIBL11_14 | 0.0178 | 0.0003 | 0.0019 | 0.0566 | 0.0011 | 0.0018 | 0.4790 | 0.0085 | 0.0300 | 0.0618 | 0.0006 | 0.0038 | 0.02 | 0.39 | 358 | 6 | 37 | 470 | 43 | 69 | 397 | 9 | 30 | 387 | 4 | 24 | 18% | 3% | Yes | " | 387 | 4 | 24 | |
| VPXIIIBL11_15 | 0.0210 | 0.0003 | 0.0022 | 0.0599 | 0.0017 | 0.0022 | 0.5680 | 0.0140 | 0.0370 | 0.0689 | 0.0009 | 0.0042 | –0.03 | 0.31 | 421 | 5 | 45 | 595 | 62 | 80 | 457 | 14 | 38 | 430 | 5 | 27 | 28% | 6% | Yes | " | 430 | 5 | 27 | |
| VPXIIIBL11_16 | 0.0201 | 0.0002 | 0.0023 | 0.0594 | 0.0007 | 0.0016 | 0.5380 | 0.0060 | 0.0335 | 0.0672 | 0.0005 | 0.0041 | 0.26 | 0.36 | 403 | 4 | 47 | 580 | 26 | 59 | 437 | 6 | 34 | 419 | 3 | 26 | 28% | 4% | Yes | " | 419 | 3 | 26 | |
| VPXIIIBL11_17 | 0.0203 | 0.0006 | 0.0025 | 0.0608 | 0.0018 | 0.0023 | 0.5580 | 0.0145 | 0.0380 | 0.0677 | 0.0010 | 0.0043 | 0.11 | 0.34 | 407 | 12 | 50 | 630 | 62 | 80 | 450 | 15 | 39 | 422 | 6 | 28 | 33% | 7% | Yes | " | 422 | 6 | 28 | |
| VPXIIIBL11_18 | 0.0170 | 0.0002 | 0.0021 | 0.0574 | 0.0009 | 0.0016 | 0.4900 | 0.0080 | 0.0320 | 0.0626 | 0.0006 | 0.0040 | 0.47 | 0.12 | 342 | 4 | 42 | 505 | 33 | 61 | 405 | 8 | 32 | 391 | 4 | 26 | 22% | 3% | Yes | " | 391 | 4 | 26 | |
| VPXIIIBL11_19 | 0.0171 | 0.0003 | 0.0022 | 0.0560 | 0.0006 | 0.0015 | 0.4645 | 0.0050 | 0.0305 | 0.0610 | 0.0005 | 0.0040 | 0.24 | 0.46 | 344 | 5 | 44 | 450 | 24 | 58 | 387 | 5 | 31 | 382 | 3 | 25 | 15% | 1% | Yes | " | 382 | 3 | 25 | |
| VPXIIIBL11_2 | 0.0193 | 0.0002 | 0.0020 | 0.0543 | 0.0004 | 0.0014 | 0.4390 | 0.0036 | 0.0280 | 0.0599 | 0.0003 | 0.0038 | 0.33 | 0.24 | 386 | 3 | 40 | 380 | 18 | 56 | 370 | 4 | 28 | 375 | 2 | 24 | 1% | –1% | Yes | " | 375 | 2 | 24 | |
| VPXIIIBL11_20 | 0.0189 | 0.0003 | 0.0023 | 0.0591 | 0.0014 | 0.0020 | 0.5160 | 0.0120 | 0.0365 | 0.0654 | 0.0007 | 0.0043 | 0.23 | 0.21 | 379 | 7 | 47 | 565 | 50 | 72 | 422 | 12 | 37 | 408 | 5 | 28 | 28% | 3% | Yes | " | 408 | 5 | 28 | |
| VPXIIIBL11_21 | 0.0201 | 0.0002 | 0.0023 | 0.0548 | 0.0006 | 0.0014 | 0.4788 | 0.0045 | 0.0320 | 0.0658 | 0.0004 | 0.0042 | 0.37 | 0.2 | 403 | 4 | 47 | 400 | 23 | 57 | 397 | 5 | 32 | 411 | 3 | 27 | –3% | –3% | Yes | " | 411 | 3 | 27 | |
| VPXIIIBL11_22 | 0.0222 | 0.0003 | 0.0026 | 0.0584 | 0.0009 | 0.0017 | 0.4790 | 0.0090 | 0.0320 | 0.0639 | 0.0007 | 0.0039 | 0.38 | 0.11 | 445 | 7 | 52 | 540 | 34 | 62 | 397 | 9 | 32 | 399 | 4 | 25 | 26% | 0% | Yes | " | 399 | 4 | 25 | |
| VPXIIIBL11_23 | 0.0211 | 0.0004 | 0.0024 | 0.0573 | 0.0010 | 0.0017 | 0.4900 | 0.0080 | 0.0315 | 0.0658 | 0.0007 | 0.0041 | 0.31 | 0.17 | 424 | 8 | 48 | 500 | 37 | 63 | 405 | 8 | 32 | 411 | 4 | 26 | 18% | –1% | Yes | " | 411 | 4 | 26 | |
| VPXIIIBL11_24 | 0.0232 | 0.0003 | 0.0026 | 0.0558 | 0.0007 | 0.0015 | 0.5020 | 0.0065 | 0.0325 | 0.0700 | 0.0006 | 0.0043 | 0.46 | 0.18 | 464 | 7 | 52 | 440 | 28 | 60 | 413 | 7 | 33 | 436 | 4 | 28 | 1% | –5% | Yes | " | 436 | 4 | 28 | |
| VPXIIIBL11_25 | 0.0236 | 0.0006 | 0.0026 | 0.0546 | 0.0010 | 0.0017 | 0.5050 | 0.0095 | 0.0335 | 0.0693 | 0.0006 | 0.0044 | 0.3 | 0.17 | 473 | 11 | 52 | 390 | 41 | 68 | 415 | 10 | 34 | 432 | 4 | 28 | –11% | –4% | Yes | " | 432 | 4 | 28 | |
| VPXIIIBL11_26 | 0.0255 | 0.0010 | 0.0030 | 0.0666 | 0.0020 | 0.0025 | 0.5830 | 0.0175 | 0.0400 | 0.0660 | 0.0007 | 0.0041 | 0.33 | –0.01 | 510 | 19 | 60 | 820 | 61 | 79 | 466 | 18 | 41 | 412 | 5 | 26 | 50% | 13% | Yes | " | 412 | 5 | 26 | |
| VPXIIIBL11_27 | 0.0220 | 0.0002 | 0.0024 | 0.0535 | 0.0006 | 0.0014 | 0.5100 | 0.0060 | 0.0325 | 0.0701 | 0.0004 | 0.0044 | 0.28 | 0.21 | 440 | 5 | 49 | 345 | 25 | 59 | 418 | 6 | 33 | 437 | 2 | 28 | –27% | –4% | Yes | " | 437 | 2 | 28 | |
| VPXIIIBL11_28 | 0.0251 | 0.0003 | 0.0028 | 0.0581 | 0.0006 | 0.0015 | 0.6250 | 0.0060 | 0.0390 | 0.0776 | 0.0003 | 0.0048 | 0.14 | 0.3 | 502 | 5 | 56 | 530 | 21 | 57 | 493 | 6 | 40 | 482 | 2 | 31 | 9% | 2% | Yes | " | 482 | 2 | 31 | |
| VPXIIIBL11_29 | 0.0204 | 0.0004 | 0.0025 | 0.0545 | 0.0007 | 0.0015 | 0.4970 | 0.0075 | 0.0300 | 0.0673 | 0.0006 | 0.0041 | 0.68 | –0.05 | 409 | 8 | 51 | 390 | 29 | 62 | 410 | 8 | 30 | 420 | 4 | 26 | –8% | –2% | Yes | " | 420 | 4 | 26 | |
| VPXIIIBL11_3 | 0.0185 | 0.0002 | 0.0019 | 0.0543 | 0.0005 | 0.0014 | 0.4420 | 0.0038 | 0.0280 | 0.0594 | 0.0003 | 0.0037 | 0.29 | 0.32 | 371 | 3 | 39 | 380 | 20 | 58 | 372 | 4 | 28 | 372 | 2 | 24 | 2% | 0% | Yes | " | 372 | 2 | 24 | |
| VPXIIIBL11_30 | 0.0221 | 0.0005 | 0.0025 | 0.0582 | 0.0010 | 0.0017 | 0.5220 | 0.0090 | 0.0335 | 0.0650 | 0.0004 | 0.0040 | 0.37 | –0.02 | 443 | 10 | 50 | 535 | 36 | 64 | 426 | 9 | 34 | 406 | 3 | 26 | 24% | 5% | Yes | " | 406 | 3 | 26 | |
| VPXIIIBL11_32 | 0.0210 | 0.0002 | 0.0023 | 0.0545 | 0.0007 | 0.0015 | 0.5220 | 0.0060 | 0.0325 | 0.0695 | 0.0004 | 0.0043 | 0.04 | 0.39 | 422 | 5 | 47 | 390 | 29 | 62 | 426 | 6 | 33 | 433 | 3 | 27 | –11% | –2% | Yes | " | 433 | 3 | 27 | |
| VPXIIIBL11_34 | 0.0804 | 0.0004 | 0.0085 | 0.1001 | 0.0003 | 0.0024 | 3.9300 | 0.0215 | 0.2400 | 0.2825 | 0.0015 | 0.0170 | 0.79 | 0.12 | 1567 | 7 | 172 | 1620 | 6 | 45 | 1620 | 22 | 244 | 1604 | 9 | 110 | 1% | 1% | Yes | 207Pb/206Pb | 1620 | 9 | 45 | |
| VPXIIIBL11_35 | 0.0219 | 0.0003 | 0.0024 | 0.0572 | 0.0008 | 0.0016 | 0.5640 | 0.0075 | 0.0345 | 0.0707 | 0.0006 | 0.0044 | 0.31 | 0.24 | 439 | 6 | 49 | 495 | 29 | 60 | 454 | 8 | 35 | 440 | 4 | 28 | 11% | 3% | Yes | 206Pb/238U | 440 | 4 | 28 | |
| VPXIIIBL11_36 | 0.0218 | 0.0002 | 0.0024 | 0.0557 | 0.0006 | 0.0015 | 0.5320 | 0.0050 | 0.0325 | 0.0672 | 0.0004 | 0.0042 | 0.34 | 0.26 | 437 | 4 | 48 | 435 | 22 | 58 | 433 | 5 | 33 | 419 | 3 | 27 | 4% | 3% | Yes | " | 419 | 3 | 27 | |
| VPXIIIBL11_38 | 0.0558 | 0.0006 | 0.0060 | 0.0799 | 0.0012 | 0.0023 | 2.0220 | 0.0260 | 0.1250 | 0.1834 | 0.0021 | 0.0115 | 0.35 | 0.55 | 1101 | 11 | 122 | 1190 | 28 | 56 | 1123 | 26 | 127 | 1086 | 13 | 74 | 9% | 3% | Yes | 207Pb/206Pb | 1190 | 13 | 56 | |
| VPXIIIBL11_39 | 0.0214 | 0.0003 | 0.0023 | 0.0553 | 0.0012 | 0.0018 | 0.4990 | 0.0095 | 0.0320 | 0.0653 | 0.0005 | 0.0041 | 0.11 | 0.26 | 429 | 7 | 47 | 420 | 47 | 71 | 411 | 10 | 32 | 408 | 3 | 26 | 3% | 1% | Yes | 206Pb/238U | 408 | 3 | 26 | |
| VPXIIIBL11_40 | 0.0210 | 0.0003 | 0.0023 | 0.0581 | 0.0011 | 0.0018 | 0.5420 | 0.0100 | 0.0345 | 0.0675 | 0.0006 | 0.0042 | 0.35 | 0.11 | 421 | 6 | 46 | 530 | 40 | 66 | 440 | 10 | 35 | 421 | 4 | 27 | 21% | 4% | Yes | " | 421 | 4 | 27 | |
| VPXIIIBL11_41 | 0.0228 | 0.0002 | 0.0025 | 0.0563 | 0.0006 | 0.0015 | 0.5410 | 0.0060 | 0.0335 | 0.0696 | 0.0004 | 0.0043 | 0.41 | 0.09 | 456 | 4 | 50 | 460 | 22 | 57 | 439 | 6 | 34 | 434 | 3 | 28 | 6% | 1% | Yes | " | 434 | 3 | 28 | |
| VPXIIIBL11_42 | 0.0234 | 0.0003 | 0.0026 | 0.0580 | 0.0009 | 0.0017 | 0.5520 | 0.0080 | 0.0350 | 0.0689 | 0.0005 | 0.0043 | 0.28 | 0.23 | 469 | 7 | 52 | 525 | 32 | 62 | 446 | 8 | 36 | 430 | 3 | 27 | 18% | 4% | Yes | " | 430 | 3 | 27 | |
| VPXIIIBL11_43 | 0.0225 | 0.0003 | 0.0025 | 0.0542 | 0.0006 | 0.0014 | 0.5120 | 0.0050 | 0.0315 | 0.0690 | 0.0004 | 0.0042 | 0.18 | 0.35 | 451 | 5 | 50 | 375 | 23 | 58 | 420 | 5 | 32 | 430 | 3 | 27 | –15% | –2% | Yes | " | 430 | 3 | 27 | |
| VPXIIIBL11_45 | 0.0204 | 0.0002 | 0.0022 | 0.0554 | 0.0007 | 0.0015 | 0.5150 | 0.0060 | 0.0320 | 0.0670 | 0.0004 | 0.0041 | 0.22 | 0.4 | 409 | 4 | 45 | 425 | 26 | 60 | 422 | 6 | 32 | 418 | 3 | 26 | 2% | 1% | Yes | " | 418 | 3 | 26 | |
| VPXIIIBL11_46 | 0.0238 | 0.0002 | 0.0026 | 0.0553 | 0.0005 | 0.0014 | 0.5513 | 0.0048 | 0.0340 | 0.0726 | 0.0004 | 0.0044 | 0.36 | 0.23 | 476 | 5 | 52 | 420 | 19 | 57 | 446 | 5 | 35 | 452 | 2 | 28 | –8% | –1% | Yes | " | 452 | 2 | 28 | |
| VPXIIIBL11_47 | 0.0910 | 0.0007 | 0.0095 | 0.6210 | 0.0070 | 0.0165 | 13.4700 | 0.1500 | 0.8500 | 0.1578 | 0.0025 | 0.0100 | 0.35 | 0.28 | 1765 | 13 | 193 | 4555 | 16 | 39 | 2713 | 152 | 863 | 945 | 16 | 64 | 79% | 187% | ~~No~~ |  |  |  |  | |
| VPXIIIBL11_48 | 0.0241 | 0.0004 | 0.0026 | 0.0612 | 0.0013 | 0.0019 | 0.5940 | 0.0110 | 0.0375 | 0.0714 | 0.0008 | 0.0044 | 0.05 | 0.28 | 482 | 8 | 52 | 645 | 44 | 67 | 473 | 11 | 38 | 445 | 5 | 28 | 31% | 6% | Yes | 206Pb/238U | 445 | 5 | 28 | |
| VPXIIIBL11_49 | 0.0231 | 0.0004 | 0.0024 | 0.0600 | 0.0009 | 0.0017 | 0.5370 | 0.0085 | 0.0340 | 0.0653 | 0.0008 | 0.0040 | 0.4 | 0.23 | 464 | 8 | 49 | 600 | 31 | 61 | 436 | 9 | 35 | 408 | 5 | 26 | 32% | 7% | Yes | " | 408 | 5 | 26 | |
| VPXIIIBL11_5 | 0.0176 | 0.0002 | 0.0020 | 0.0540 | 0.0007 | 0.0015 | 0.4430 | 0.0055 | 0.0280 | 0.0591 | 0.0003 | 0.0037 | 0.12 | 0.32 | 354 | 3 | 40 | 370 | 29 | 60 | 372 | 6 | 28 | 370 | 2 | 24 | 0% | 1% | Yes | " | 370 | 2 | 24 | |
| VPXIIIBL11_51 | 0.0222 | 0.0003 | 0.0023 | 0.0543 | 0.0007 | 0.0015 | 0.4920 | 0.0065 | 0.0310 | 0.0670 | 0.0005 | 0.0042 | 0.3 | 0.15 | 445 | 7 | 47 | 380 | 29 | 62 | 406 | 7 | 31 | 418 | 3 | 27 | –10% | –3% | Yes | " | 418 | 3 | 27 | |
| VPXIIIBL11_52 | 0.0225 | 0.0003 | 0.0024 | 0.0544 | 0.0009 | 0.0016 | 0.5040 | 0.0085 | 0.0325 | 0.0677 | 0.0004 | 0.0043 | 0.31 | 0.08 | 452 | 6 | 48 | 385 | 35 | 64 | 414 | 9 | 33 | 422 | 3 | 27 | –10% | –2% | Yes | " | 422 | 3 | 27 | |
| VPXIIIBL11_53 | 0.0232 | 0.0003 | 0.0025 | 0.0553 | 0.0008 | 0.0015 | 0.5300 | 0.0070 | 0.0340 | 0.0704 | 0.0004 | 0.0045 | 0.31 | 0.19 | 465 | 6 | 50 | 420 | 30 | 61 | 432 | 7 | 35 | 438 | 3 | 29 | –4% | –1% | Yes | " | 438 | 3 | 29 | |
| VPXIIIBL11_54 | 0.0229 | 0.0003 | 0.0024 | 0.0543 | 0.0007 | 0.0015 | 0.5110 | 0.0065 | 0.0325 | 0.0690 | 0.0004 | 0.0044 | 0.18 | 0.24 | 458 | 6 | 49 | 380 | 29 | 62 | 419 | 7 | 33 | 430 | 3 | 28 | –13% | –3% | Yes | " | 430 | 3 | 28 | |
| VPXIIIBL11_55 | 0.0221 | 0.0002 | 0.0024 | 0.0543 | 0.0004 | 0.0014 | 0.5100 | 0.0043 | 0.0325 | 0.0683 | 0.0004 | 0.0043 | 0.43 | 0.19 | 444 | 4 | 49 | 380 | 17 | 56 | 418 | 4 | 33 | 426 | 2 | 28 | –12% | –2% | Yes | " | 426 | 2 | 28 | |
| VPXIIIBL11_57 | 0.0206 | 0.0002 | 0.0023 | 0.0557 | 0.0006 | 0.0015 | 0.5000 | 0.0050 | 0.0320 | 0.0656 | 0.0004 | 0.0042 | 0.21 | 0.32 | 414 | 3 | 46 | 435 | 22 | 58 | 412 | 5 | 32 | 410 | 2 | 27 | 6% | 0% | Yes | " | 410 | 2 | 27 | |
| VPXIIIBL11_58 | 0.0200 | 0.0003 | 0.0023 | 0.0551 | 0.0010 | 0.0017 | 0.4860 | 0.0090 | 0.0320 | 0.0658 | 0.0006 | 0.0041 | 0.15 | 0.28 | 402 | 6 | 46 | 415 | 41 | 67 | 402 | 9 | 32 | 411 | 4 | 26 | 1% | –2% | Yes | " | 411 | 4 | 26 | |
| VPXIIIBL11_6 | 0.0189 | 0.0002 | 0.0022 | 0.0554 | 0.0006 | 0.0015 | 0.4907 | 0.0048 | 0.0300 | 0.0627 | 0.0003 | 0.0039 | 0.21 | 0.33 | 380 | 5 | 44 | 425 | 22 | 58 | 405 | 5 | 30 | 392 | 2 | 25 | 8% | 3% | Yes | " | 392 | 2 | 25 | |
| VPXIIIBL11_7 | 0.0178 | 0.0001 | 0.0020 | 0.0544 | 0.0006 | 0.0014 | 0.4657 | 0.0046 | 0.0285 | 0.0607 | 0.0003 | 0.0038 | 0.25 | 0.21 | 357 | 3 | 41 | 385 | 23 | 58 | 388 | 5 | 29 | 380 | 2 | 24 | 1% | 2% | Yes | " | 380 | 2 | 24 | |
| VPXIIIBL11_8 | 0.0690 | 0.0006 | 0.0075 | 0.1202 | 0.0005 | 0.0029 | 4.6320 | 0.0305 | 0.2800 | 0.2732 | 0.0015 | 0.0170 | 0.81 | 0.01 | 1352 | 11 | 152 | 1955 | 7 | 43 | 1755 | 31 | 284 | 1557 | 10 | 110 | 20% | 13% | Yes | 207Pb/206Pb | 1955 | 10 | 43 | |
| VPXIIIBL11_9 | 0.0211 | 0.0004 | 0.0024 | 0.0551 | 0.0010 | 0.0017 | 0.5180 | 0.0090 | 0.0325 | 0.0664 | 0.0006 | 0.0042 | 0.27 | 0.2 | 423 | 8 | 48 | 415 | 41 | 67 | 424 | 9 | 33 | 414 | 4 | 27 | 0% | 2% | Yes | 206Pb/238U | 414 | 4 | 27 | |
| *Internal (int) or propagated (prop) uncertainties from Iolite software (Paton et al., 2011).  †Discordance was calculated between 206Pb/238U and 207Pb/235U and between 206Pb/238U and 207Pb/206Pb ages; the smallest of the two values was used during the filtering.  §Filters used: discordance +20%/–10%, age uncertainty >10%.  #”Best” age of a grain was calculated from either 206Pb/238U or 207Pb/206Pb, depending on the lower uncertainty between the two systems. | | | | | | | | | | | | | | | | | | | | | | | | | | | | | | | | | |
